# PREPRINT VERSION

## Biomechanics of the peafowl's crest reveals frequencies tuned to

### 2 social displays

4 Suzanne Amador Kane\*<sup>1</sup>, Daniel Van Beveren<sup>1</sup>, Roslyn Dakin<sup>2,3</sup>

6 <sup>1</sup> Physics Department, Haverford College, Haverford, PA USA

8 <sup>2</sup> Department of Zoology, University of British Columbia, Vancouver, BC, Canada

10 <sup>3</sup> Migratory Bird Center, Smithsonian Conservation Biology Institute, Washington, DC, USA

12 \* Corresponding author

Email: samador@haverford.edu

14

**Short title:** Biomechanics of peafowl feather crests

16

**Keywords:** feather; mechanoreception; resonance; near-field sensing; peacock; multi-modal

18 signaling

# PREPRINT VERSION

## Abstract

20 Feathers act as vibrotactile sensors that can detect mechanical stimuli during avian flight and  
tactile navigation, suggesting that they may also detect stimuli during social displays. In this  
22 study, we present the first measurements of the biomechanical properties of the feather crests  
found on the heads of birds, with an emphasis on those from the Indian peafowl (*Pavo cristatus*).  
24 We show that in peafowl these crest feathers are coupled to filoplumes, small feathers known to  
function as mechanosensors. We also determined that airborne stimuli with the frequencies used  
26 during peafowl courtship and social displays couple efficiently via resonance to the vibrational  
response of their feather crests. Specifically, vibrational measurements showed that although  
28 different types of feathers have a wide range of fundamental resonant frequencies, peafowl crests  
are driven near-optimally by the shaking frequencies used by peacocks performing train-rattling  
30 displays. Peafowl crests were also driven to vibrate near resonance in a playback experiment  
that mimicked the effect of these mechanical sounds in the acoustic very near-field, reproducing  
32 the way peafowl displays are experienced at distances  $\leq 1.5\text{m}$  *in vivo*. When peacock wing-  
shaking courtship behaviour was simulated in the laboratory, the resulting airflow excited  
34 measurable vibrations of crest feathers. These results demonstrate that peafowl crests have  
mechanical properties that allow them to respond to airborne stimuli at the frequencies typical of  
36 this species' social displays. This suggests a new hypothesis that mechanosensory stimuli could  
complement acoustic and visual perception and/or proprioception of social displays in peafowl  
38 and other bird species. We suggest behavioral studies to explore these ideas and their functional  
implications.

# PREPRINT VERSION

## 40 **Introduction**

42 Bird feathers are known to act as mechanosensors that allow birds to detect and respond to a  
44 variety of mechanical stimuli [1–3]. For example, flight, contour, and facial bristle feathers can  
46 act as sensors that provide important information during flight and prey capture [4,5,3,6,7].  
48 Indeed, feathers have been suggested to have evolved originally to serve sensory functions,  
50 because even isolated protofeathers could have played a sensory role before the evolution of  
52 specialized arrays of feathers that enabled flight or thermoregulation [8]. Feather head crests  
54 have been found in fossils of some dinosaurs and early birds as well as a wide variety of living  
56 species of birds [9,10]. While feather crests have usually been studied for their roles as possible  
58 visual signals [11–13, see also 14 for a review], recent behavioral studies of two auklet species  
60 have shown that their erect head crest feathers can play a mechanosensory role during tactile  
62 navigation similar to that of mammalian whiskers and arthropod antennae [14,15]. These  
findings suggest that feather crests in other birds also might play a previously unrecognized  
mechanosensory functional role. Crest feathers and other types of feathers found on the heads of  
birds have received little attention in the literature, especially in comparison to the significant  
body of literature on the morphology and mechanical properties of wing, tail and train covert  
feathers [16]. In addition, no research has considered whether birds, like some arthropods, might  
detect air-borne stimuli generated during social displays via mechanoreception, or what influence  
this may have on their social interactions.

60 Here we report on the first biomechanical study of bird crest feathers, with an emphasis on  
understanding how their physical properties might relate to their various possible functions. This  
62 work focused on the large crest of the Indian Peafowl (*Pavo cristatus*), which is found on both

# PREPRINT VERSION

sexes [17]. The male of this species (“peacock”) performs elaborate multimodal courtship  
64 displays accompanied by mechanical sound experienced by nearby females. During their  
displays, male Indian peafowl (“peacocks”) attract mates by spreading and erecting their train (a  
66 fan-like array of long, colorful feathers) and performing two dynamic courtship behaviors. First,  
during “wing-shaking, the male flaps his partially-unfurled wings at approximately 5.4 Hz with  
68 his backside facing the female (“peahen”). Next, during “train-rattling”, the male vibrates his  
tail and train at 25-28 Hz (mean 25.6 Hz) while facing toward the female at close range (1 to 1.5  
70 m) (Fig 1A, S1 Movie), causing the train to shimmer iridescently and emit a prolonged “rattling”  
sound [18–20]. Train-rattling performance by peacocks is obligatory for mating success [18], and  
72 eye-tracking experiments have shown that both wing-shaking and train-rattling displays are  
effective at attracting and holding the peahen’s gaze [21]. Peahens also perform a tail-rattling  
74 display at 25-29 Hz in a variety of contexts [20], suggesting that feather vibrations might serve  
other communicative functions as well. Three studies have found that birds respond behaviorally  
76 to playbacks of low frequency sound generated by social displays: peafowl detect the infrasound  
( $< 20$  Hz) component of train-rattling and wing-shaking recordings [19]; male houbara bustards  
78 (*Chlamydotis undulata undulata*) respond to low frequency (40-54 Hz) boom vocalizations [22];  
and male ruffed grouse (*Bonasa umbellus*) respond to  $45 \pm 6$  Hz wing beating “drumming”  
80 displays [23]. Several other studies have also measured the behavioral response of birds to  
amplitude-modulated low repetition rate broad-band pulses, which are similar to the mechanical  
82 sounds associated with peacock train-rattling; the results of these studies showed that birds from  
three different families can detect such sounds with repetition rates  $< 40$  Hz [24–26]. However,  
84 no studies have considered whether peafowl or other birds might detect such mechanical sounds

# PREPRINT VERSION

via vibrotactile perception (i.e., sensing sound air particle velocity or airflow impulses via feather  
86 vibrations or deflections) as well as by hearing (sound pressure wave reception).

88 **Fig 1. Morphology of peafowl crests and crest feathers.** (A) A peahen (foreground) with the  
plane of her crest oriented towards the displaying peacock (background) as he performs train-  
90 rattling vibrations. (B) Both sexes have a crest with an inverted pendulum shape made up of  
between 20-31 feathers. This photo shows an adult male measured *in vivo*. (C) A single crest  
92 feather showing the pennaceous flag at the distal end. Note that only short, thin barbs are present  
on the relatively bare rachis (shaft) at the proximal end. (D) A whole crest sample mounted for  
94 the laboratory experiments. The two axes of vibrational motions (“in-plane” and “out-of-plane”)  
are indicated. (E) Mechanosensory filoplumes (circled) are located at the base of the peafowl  
96 crest feathers.

98 One possible means by which peafowl might sense sound by vibrotactile perception is the fan-  
like crest (Figs 1A,B), a planar array of feathers oriented in the sagittal plane that is found on the  
100 heads of both sexes [17]. Each crest feather has a spatulate “flag” of pennaceous vanes at the  
distal end and a long shaft that is mostly bare except for short, sparse barbs along its proximal  
102 end (Fig 1C). The pennaceous flag of peafowl crest feathers might couple to oscillations in  
surrounding air via drag forces induced by flow of the surrounding medium, as well as via forces  
104 exerted on the flag’s face by incident pressure waves.

106 We first consider the mechanical properties one would expect feathers to have to function  
effectively as mechanosensors, based on mechanoreception in other animals. Our predictions

# PREPRINT VERSION

108 (P1-P4) are outlined in Box 1 below. A large body of research in mammals and arthropods has  
found that antennae and sensory hairs play important mechanosensory roles in sound detection;  
110 this function is also known to be influenced by their vibrational response and mechanical  
structures [27,28]. For example, in order for a feather crest to sense environmental airflows, it  
112 would need to bend sufficiently to activate mechanosensory nerve cells (P1-P4; Box 1), as has  
been shown for pigeon covert feathers [2], arthropod sensory hairs, pinniped whiskers, bat  
114 sensory hairs, fish lateral line organs [29], and rat whiskers [30,30]. Thus, one would expect  
crest feathers to be compliant enough to deflect when stimulated by salient airflow stimuli.  
116 Sound consist of oscillations of the surrounding medium in both pressure and particle velocity.  
Animals can detect pressure oscillations using ears and tympanal organs, whereas particle  
118 velocity oscillations can be detected in a variety of ways, including using sensory hairs and  
antennae that have mechanosensors at their bases [31,32]. Feathers of all types in birds of all  
120 orders have at their bases specialized short mechanosensitive feathers called filoplumes that  
couple to motions of their associated feather's shaft [33,34]; thus, we expect this to also be true  
122 for crest feathers (prediction P1; Box 1). Like many sensory hairs and antennae, the plumose  
structure of feathers enables effective mechanical coupling to air motions via drag forces [2,35]  
124 and elongated, tapering shafts well-suited for bending and transmitting force to an enervated  
base. Both contour feathers and filoplumes have been shown empirically to detect bending and  
126 vibrations via mechanoreceptive Herbst corpuscles at their bases [36,2,3,37].

128 Because the peafowl's region of most acute vision is oriented laterally [38], when a peahen gazes  
at a displaying male, the maximum area of her crest feathers also points toward the peacock's  
130 moving feathers (Fig 1A). This results in an optimal orientation for intercepting airborne

# PREPRINT VERSION

vibrations generated by display behaviors; these medium oscillations should tend to drive feather  
132 crests to oscillate in the “out-of-plane” orientation (i.e., normal to the plane of the crest as shown  
in Fig 1D). The displaying peacock shakes its body laterally during such behaviors, so any  
134 corresponding vibrations of its own crest should also occur in the out-of-plane direction. The  
design of the crest also provides a mechanical advantage, enabling it to transmit a magnified  
136 version of the forces applied to its distal end to its base, because the flag is wider than the tapered  
base and because each feather shaft acts as a lever arm coupling the flag to the base.

138

## **Box 1. Predicted properties of feathers that detect airborne stimuli**

- 140 P1. Coupled to mechanosensory structures. (*Morphology; Figs 1-2*)  
P2. Frequency-tuned to stimuli with well-defined frequencies. (*Vibrational dynamics*  
142 *measurements; Fig 3*)  
P3. Damped at the right level to allow detection of airflow impulse rate. (*Force impulse*  
144 *experiments; Fig 4*)  
P4. Responsive to experimentally-simulated social stimuli. (*Audio playback experiments,*  
146 *Simulated wing-shaking experiments; Figs 5-6*)

148 Another important consideration is the frequency-tuning between sensory structures and their  
stimuli (prediction P2; Box 1), as this can provide several advantages including filtering out  
150 background noise and other irrelevant stimuli [31]. In fact, a variety of arthropods use receivers  
with a response that is frequency-matched to the stimulus source, including antennae and sensory  
152 hairs used by various insect species to detect wingbeat signals of near-by conspecifics,  
trichobothria used by some arachnids to sense prey wingbeats [39–43], and frequency-tuned

# PREPRINT VERSION

154 eardrums used by cicadas and crickets to detect conspecific songs [44,45]. Such mechanical  
frequency tuning can be accomplished readily via resonance, the phenomenon whereby an object  
156 responds with maximum amplitude to a driving force that oscillates near one of its natural  
frequencies of vibration [31]. Resonant frequency matching enables a mechanoreceptor to  
158 respond with optimal sensitivity to low amplitude airborne stimuli, at the expense of frequency  
discrimination (by contrast, human eardrums and microphones have broadly-tuned resonance  
160 responses that allow efficient detection of natural stimuli over a wide range of frequencies).

162 Therefore, given that peafowl displays take place at well-defined shaking frequencies, we predict  
that their feather crests might have a resonant frequency response with a peak and width matched  
164 to the display, as found for the arthropods cited above. If this frequency tuning is indeed present,  
the crest might enable peafowl to detect airborne stimuli generated by a conspecific individual's  
166 shaking motions by undergoing sympathetic vibrations (i.e., undergoing oscillations driven by  
coupling through drag forces to air particle velocity oscillations). Feather crests optimized to  
168 vibrate at the shaking frequency could also provide proprioceptive feedback to the individual  
performing the display [46,47,31].

170  
Some arthropods have the additional ability to use mechanosensory hairs to sense separate  
172 airflow pulses generated by abrupt, repetitive motions. The resulting impulsive forces cause the  
mechanosensors to oscillate only briefly at their natural frequency before their motion is damped  
174 out. For example, the cerci sensory hairs of female African crickets (*Phaeophilacris spectrum*)  
function in this way to detect air vortices produced by males performing wing flicks [48–50].  
176 These motions are similar to those performed during peacock wing-shaking displays. Detecting



# PREPRINT VERSION

airflow impulses via transient oscillations requires the right level of damping and natural  
178 frequency to allow a high amplitude response while also enabling detection of the airflow  
impulse repetition rate (prediction P3). Consequently, feather crests would also need this  
180 specific combination of vibrational response parameters in order to respond efficiently to  
impulsive airflows generated by wing motions.

182  
In other animals, vibrotactile sensors detect sound particle velocity oscillations in the acoustic  
184 near-field, a region close enough to the source that particle velocity can couple efficiently to  
mechanoreceptors via drag forces [31]. For example, in arthropods, many species use filiform  
186 hairs to detect near-field particle velocity for predator or prey detection and for intraspecies  
signaling [51–53]. Near-field communication has been studied in a wide variety of invertebrate  
188 terrestrial taxa [54,51] and in fish [55]. By contrast, it is often assumed that only the acoustic far-  
field is relevant for sound reception by birds. In the far-field, sound predominantly consists of  
190 pressure waves detectable by vertebrate ears, insect tympanal organs and similar receptors.  
Because the particle velocity magnitude falls off more rapidly with distance than the pressure  
192 wave component, particle velocity stimuli are greater than those due to pressure waves only for  
distances  $R < 0.16$  to  $0.22 \lambda$  (where  $\lambda$  = wavelength) for monopole sources (e.g., loudspeakers)  
194 and dipole sources (e.g., moving wings, tails and trains), respectively [56,31,57]. Consequently,  
this wavelength-dependent distance is often used to distinguish the acoustic far- and near-fields.  
196 However, the relevant criterion for efficient mechanosensation is the *absolute magnitude* of  
particle velocity, not the *relative value* of particle velocity compared to the pressure wave [58].  
198 Thus, the regime relevant for vibrotactile sensing is the flow (reactive) near-field: the region near  
the sound source where the particle velocity has its greatest magnitude because the air acts as a

# PREPRINT VERSION

200 layer of effectively incompressible fluid that moves with the source [32,59]. The extent of the  
flow near-field depends on source size,  $A$ , not wavelength (see e.g., Fig 2 in [59]). For  $R \leq 0.16$   
202  $A$  (the “very near-field”), the particle velocity is approximately constant. As  $R$  increases,  
particle velocity becomes negligible for mechanosensing at approximately  $R \approx A$  [31,59,35].  
204 The lateral extent of the flow near-field also depends on  $A$ . In addition, the overall magnitude of  
the particle velocity increases as  $A^2$  for a monopole and  $A^3$  for a dipole. In summary, increasing  
206 source size,  $A$ , increases the spatial extent of the flow near-field regime in which  
mechanoreception can take place, as well as the magnitude of particle velocity stimuli [56].  
208  
During the peacock’s display, typical female-male distances,  $R = 1.0$  to  $1.5$  m, are equal to the  
210 typical peacock train radius, which plays the role of source size  $A$ . Female therefore experience  
train-rattling sound in the acoustic flow near-field [18,60], satisfying a prerequisite for  
212 vibrotactile sensing. The criterion  $R = 1$  to  $1.5$  m  $< 0.22 \lambda$  corresponds to frequencies  $< 50$  to  $75$   
Hz at this distance; therefore, the mechanical sound generated by the peacock’s display has  
214 appreciable pressure wave magnitude as well for most frequencies in the human audible range.  
Spectrograms from earlier studies of peacock train-rattling indicate that these mechanical sounds  
216 consist of broadband impulsive rattles with spectral density primarily in the human audible  
range, emitted at a repetition rate of approximately  $26$  Hz; they are neither low frequency pure  
218 tones, nor are they sound with spectral density predominantly in the low frequency or infrasound  
regime [19,20]. As a result, a consideration of the sound fields of peacock train-rattling displays  
220 indicates that rattling sounds might be detectable as particle velocity or pressure wave stimuli, or  
both, at typical display distances.

222

# PREPRINT VERSION

In this study, we compare the mechanical properties of peafowl crests with those predicted for  
224 mechanosensation (predictions P1-3; Box 1), and we furthermore test whether stimuli from  
peacock displays induce a vibrational response in the crest (prediction P4). We also wished to  
226 determine whether any agreement between social display frequencies and crest resonant  
frequencies was generic or specific to this system. Therefore, we sought to understand how the  
228 peafowl crest's resonant properties relate to those of other types of peafowl feathers as well as  
crest feathers from other species. This work was designed to serve as a first step to determine  
230 whether the head crests of birds might serve a variety of mechanosensory functions, including  
the detection of body self-motion and various airborne stimuli.

232

## Materials and methods

### 234 Morphology

A total of  $n = 7$  male and  $n = 8$  female Indian peafowl (*Pavo cristatus* Linnaeus 1758) head  
236 crests with the feathers still mounted in skin were obtained from Moonlight Feather (Ventura,  
CA USA) and Antebellum Anne (Pell City, AL USA); other peacock samples and crest feathers  
238 from four other bird species were obtained from Moonlight Feather (Ventura, CA USA),  
Assiniboine Park Zoo (Winnipeg, Manitoba, Canada) and Siskiyou Aviary (Ashland, OR USA)  
240 (see S1 Table and S1 Fig for details).

242 Motivated by reports that mechanosensitive auklet crest feathers are filoplumes [14] and that  
filoplumes from diverse species spanning several orders might function to detect disturbances of  
244 the surrounding feathers [61–64], we used microscopy to determine whether peafowl crest  
feathers either are themselves filoplumes or have filoplumes at their bases. A Digital

# PREPRINT VERSION

246 Microscope Pro (Celestron, Torrance, CA USA) was used to examine the base of peafowl crest  
feathers to determine whether filoplumes were present, using the structural criteria employed in  
248 previous studies of this feather type (i.e., short feathers with a long, bare shaft with a tuft of short  
barbs on the distal end, located near the base of a longer feather but not growing from the same  
250 follicle [61,33,62,64,63,65]; see micrographs in [33,36,65]. Crest length and width  
measurements were made by hand and from digital photographs of the crest samples and high-  
252 resolution scans (0.02 mm/pixel) of single feathers with a ruler included in the sample plane. We  
used these measurements to compare the morphology of dried crest samples with that found for  
254 crests on live peafowl in a previous study [17], including length, width and number of feathers.  
Because some peafowl, especially females, have non-uniform crest feather lengths [17], we also  
256 measured the lengths of individual feathers within the dried crest samples to compare with the  
previous study. If the crest feathers were closely clustered, the attached skin was first softened in  
258 water and the crest was spread to approximate its natural configuration.

260 Following earlier studies of feather vibrational properties [20,66,67], we mounted crest feathers  
by gluing the crest skin to a rigid sample holder (a 2.5 cm cube of balsa wood) (Fig 1D). This  
262 method is justified because the resonant frequency of a flexible shaft secured at one end by a stiff  
clamp is not expected to be affected by the clamp's mechanical properties [31]. In an earlier  
264 study, we had verified that this is true for peafowl tail and train feathers [20]: i.e., there was  
minimal shift (< a few percent) in feather resonant frequencies in the frequency range considered  
266 in this study when samples were mounted on rigid wooden blocks vs. embedded in a compliant  
gel to mimic the shaft's native soft tissue environment. Further supporting this method, we  
268 found good agreement between train-rattling display shaking frequencies and the value predicted

# PREPRINT VERSION

from a model of the peacock tail's resonant frequency based on laboratory measurements [20]; in  
270 addition, an earlier study of manakin feather resonance that used similar mounting methods  
found good agreement between the frequencies of feather vibrational resonance measured in the  
272 laboratory and sonations recorded in the field [66].

274 Because interactions between feathers can influence their resonant frequency and damping  
[66,68], we compared the biomechanics of whole crests to that of isolated crest feathers. To  
276 study individual, isolated crest feathers, we removed all but three to five feathers (on the outer  
edges and in the middle) from two male crests and one female crest and analyzed the  
278 characteristics of those remaining feathers. Note that because this procedure was necessarily  
destructive, it precluded any further whole-crest analyses on those samples, we limited it to only  
280 the three crests. Isolated body and crest feathers were inserted into a close-fitting hole in the  
wood base using polyvinyl acetate glue. For measurements on other peafowl feathers and crest  
282 feathers from other species, all but two feather samples in S1 Table were inserted up to the top of  
their calamus (the part of the shaft inserted into the skin). The Victoria crowned pigeon crest  
284 feathers had been trimmed just above the calamus, so they were mounted such that 3 mm of the  
exposed feather shaft (3% of its length) was inserted into the wooden base.

286  
To ensure further that the feathers had the same mechanical properties as those found on live  
288 birds, we stored and tested all samples using environmental conditions similar to those measured  
during the peafowl behaviors of interest. Because earlier research on feather keratin indicated  
290 that water content can affect its elastic modulus [69], all crest samples were stored and all  
laboratory measurements were taken at 21.1 C° (range: 20.8-21.5°) and 74.8% relative humidity

# PREPRINT VERSION

292 (range 72.3-77.7%). For comparison, peacock train-rattling display frequencies were measured  
in the field at a median temperature of 19.4°C and a median relative humidity of 60.7% [20],  
294 with over half of the displays occurring within  $\pm 2.2^\circ\text{C}$  and  $\pm 14\%$  of the average laboratory  
temperature and relative humidity, respectively. Moreover, a re-analysis of previous published  
296 data on 35 peacock displays performed by 12 males in the field [20] shows that there is no  
significant association between display vibration frequency and relative humidity ( $p > 0.45$ )  
298 when accounting for the date and time of the displays. This analysis and the associated data are  
provided in the data repository for this study [70]. As an additional check, we also measured the  
300 audio playback response with crest samples held at 35% relative humidity and 22 C° for 1 min to  
10 min and found no measurable change in the natural frequency over this time.

302

## **Ethics statement**

304 All research procedures were approved by the Haverford College Institutional Animal Care and  
Use Committee (protocol #sak\_050916).

306

## **Vibrational dynamics measurements**

308 To determine the vibrational resonant frequency of each feather sample, and its relationship to  
possible driving mechanisms during displays, we applied a sinusoidal force to the sample while  
310 measuring its resulting vibrational amplitude as a function of the driving force's frequency. The  
system's vibrational response (transfer function) is then computed as the ratio of the sample's  
312 amplitude of response to the driving stimulus magnitude [71,66,67]. For these measurements we  
mounted each feather sample on a model SF-9324 mechanical shaker (Pasco Scientific,  
314 Roseville, CA, USA) driven by an Agilent 33120A function generator (Agilent Technologies,

# PREPRINT VERSION

Wilmington, DE, USA) (S1 Fig). This apparatus applied sinusoidal forces with a linearly  
316 varying frequency (“frequency sweeps”) while high-speed video was used to measure the  
amplitude and frequency of vibration of both the driving mechanism and the feather sample  
318 (details on the frequency sweep parameters and video methods are discussed below). The  
driving force was applied in two orthogonal directions (Fig 1D): 1) “out-of-plane” (oriented  
320 normal to the plane of the crest), corresponding to the geometry when a peafowl views a display  
with its laterally-oriented visual field, or drives its own crest into vibrations by performing a  
322 train- or tail-rattling display [20]; and 2) “in-plane” (oriented parallel to the plane of the crest, in  
the posterior-anterior axis of the head), corresponding to the geometry when the front of the head  
324 is oriented towards the display.

326 The resulting vibrational response spectra of the crests were measured using three linear  
frequency sweeps. One of these sweeps used the frequency range (0-80 Hz) to include all peaks  
328 in the spectral response found for peacock tail and trail feathers in an earlier study [20]; the rate  
of frequency increase (1.33 Hz/s) was chosen to be less than the values measured at the start of  
330 peafowl displays in the same study. These conditions were used to test the vibrational response  
in the out-of-plane direction for each of the 15 peafowl crests, as well as three of the crests that  
332 had been trimmed down to have only three to five isolated crest feathers remaining ( $n = 3$  trials  
for each sample); this allowed us to compare the vibrational response of intact crests with that of  
334 isolated crest feathers. We ran the following additional trials to make sure that this combination  
of frequency range and sweep rate above did not miss any spectra peaks or affect the shapes of  
336 the resonant peaks: six crests out-of-plane at 10-120 Hz (1.83 Hz/s;  $n = 18$  trials), six crests out-  
of-plane at 0-15 Hz (0.25 Hz/s,  $n = 6$  trials), five crests in-plane at the 0-80 Hz range (1.33 Hz/s;

# PREPRINT VERSION

338  $n = 14$  trials), and two crests in-plane at 10-120 Hz (1.83 Hz/s;  $n = 2$  trials). For one crest, we  
determined that varying the amplitude of shaking by a factor of four resulted in the same  
340 resonant response within measurement error.

342 We also measured the resonant vibrational response of crest feathers for several other types of  
short peacock feathers (three lengths of peacock mantle feathers, the shortest length of train  
344 eyespot feather, and four different body contour feathers), and for one or more crest feathers  
from four other bird species: two additional species from order Galliformes, the Himalayan  
346 monal (*Lophophorus impejanus*) and the golden pheasant (*Chrysolophus pictus*); the Victoria  
crowned pigeon (*Goura Victoria*) from the order Columbiformes, and the yellow-crested  
348 cockatoo (*Cacatua sulphurea*) from the order Psittaciformes; see S1 Table and S1 Fig for details.  
The resonant response for each of these feathers was measured for driving forces in the out-of-  
350 plane direction for  $n = 3$  trials for each feather at each of two frequency sweep rates (2.0 Hz/s, 0  
to 120 Hz; 1.33 Hz/s, 0 to 80 Hz); the Himalayan monal sample was also studied using a sweep  
352 rate of 0.5 Hz/s over 0 to 30 Hz because it had a lower frequency response.

## 354 **Video analysis**

We recorded feather vibrational motions using high-speed video filmed with a GoPro Hero 4  
356 Black Edition camera (720 x 1280 pixels; 240 frames  $s^{-1}$ ; GoPro, San Mateo, CA, USA). Similar  
video and imaging-based methods have been used to measure resonance in whiskers [71–74],  
358 insect antennae [75], feathers [76] and human-made structures [77,78]. Image and data analysis  
were performed using custom programs based on the MATLAB 2015a Machine Vision, Signal  
360 Processing and Curve Fitting toolboxes (MathWorks, Natick, MA, USA); the MATLAB scripts



# PREPRINT VERSION

to reproduce this analysis are available with the data repository for this study [70]. The Nyquist  
362 frequency, which gives the upper bound on measurable frequencies [79], was 120 Hz (half the  
frame capture rate) ( $> 4\times$  typical biological vibration frequencies used during peafowl displays).  
364 Images were first corrected for lens distortion using the MATLAB Camera Calibration tool. All  
feather motions analyzed were in the plane of the image, and thus did not require correction for  
366 perspective [80]. To analyze feather motion, we first used auto-contrast enhancement and  
thresholding to track the mean position of the crest feather flags and the shaker mount, and then  
368 computed the spectrogram of each object's tracked position during the frequency sweep using a  
Hanning filter. This yielded the magnitude of the fast Fourier transform (FFT) at each  
370 vibrational drive frequency,  $f_d$ , measured for motion of the crest flag,  $A$ , and that of the sample  
holder,  $A_d$ , which provides the driving force. Mechanical shakers have a frequency response that  
372 necessarily rolls off in amplitude at the low frequencies considered here due to fundamental  
physical principles [79]; see, e.g. inset to Fig 1A in [81]. To account for frequency-dependent  
374 variation in the driving force, we then divided the sample's magnitude,  $A$ , by the shaker drive  
magnitude,  $A_d$ , at each drive frequency,  $f_d$ , and smoothed the ratio over a 1.3 Hz window using a  
376 cubic Savitzky-Golay filter to give the drive transfer function,  $H(f_d) = A/A_d$  [71,66]. Nonlinear  
least squares fitting using Origin 8.6 (Originlab, Northampton MA USA) was used to fit each  
378 peak in the transfer function, to a Lorentzian spectral response:

$$H(f_d) = \frac{A}{A_d} = \frac{f_r/f_d}{\sqrt{(f_r/f_d - f_d/f_r)^2 + (\Delta f/f_r)^2}} \quad (1)$$

380 where the fit parameters are  $f_r$ , the resonant frequency, and  $\Delta f$ , the full-width-half-maximum of  
the spectral power; this yielded mean and s.e.m. estimates for the fit parameters as well as the  
382 quality factor,  $Q = f_r / \Delta f$ , a measure of how sharply the transfer function is peaked about the  
resonant frequency [79].

# PREPRINT VERSION

384

## Force impulse experiments

386 A second standard method for determining the vibrational response of a system involves  
applying a transient impulsive force and then measuring the system's subsequent vibrational  
388 response to measure its natural frequency of vibration,  $f_o$ , and the exponential decay in time of its  
vibrational amplitude [71,82,72,75,76]; this is analogous to striking a bell and recording how it  
390 rings at a well-defined frequency as its sound intensity decays in time. This method is also  
relevant for determining the response of the crest to impulsive airflows due to each flap of the  
392 wing during wing-shaking. Thirdly, it also serves as a check on the validity of the vibrational  
response frequency sweep methods described above, because the natural and resonant frequency  
394 should be related as [79]:

$$f_o = f_r \sqrt{1 - \frac{1}{2} Q^2} \quad (2)$$

396 This prediction can be tested by comparing the natural frequency measured directly from the  
force impulse method with the value computed from the vibrational response's transfer function  
398 using Eq 1 and 2.

400 To determine the peafowl crests' response to impulsive airflows, we impacted crests with single  
air ring vortices and measured the resulting motions on video. A Zero Blaster vortex gun (Zero  
402 Toys, Concord, MA, USA) was used to generate single air vortex rings of artificial fog (2-4 cm  
in diameter, 1 cm diameter cross-section, speed 1.8 m/s [95% CI 1.7, 2.0 m/s, range 1.5 - 2.1  
404 m/s]), aimed so as to impact whole crests (n = 2 peacock and 1 peahen) in the out-of-plane  
orientation. The motion of crest feathers struck by the vortices was measured by tracking the  
406 crest position on high-speed video when an intact vortex impacted the crest oriented with its

# PREPRINT VERSION

widest cross-section facing the source at 0.5 m from the point of creation. As explained above,  
408 because we expected such impulses to result in the crest feathers oscillating at their natural  
frequency, this provided an additional check on our resonant frequency values. This also  
410 provides a model for understanding how crest feathers would respond to impulsive airflows  
generated by other sources (e.g., displays, wind, etc.).

412

## **Audio playback experiments and analysis**

414 To determine if peafowl crests can vibrate detectably due to peacock train-rattling, we filmed  
high-speed video of peahen crest samples placed in the flow near-field of a loudspeaker playing  
416 back train-rattling sounds. Note that because peacock train-rattling consists of broad-band rattles  
at low repetition rates, not pure tones, we used audio equipment rated for frequencies 20 Hz to  
418 20 kHz rather than equipment designed for infrasound, similar to how one would treat the sound  
of hands clapping or birds calling at a repetition rate of a few Hz. To generate audio playback  
420 sequences, we used audio field recordings (24-bit, 44.1 kHz, no filtering) of peacock train-  
rattling displays made using a PMD661 recorder ( $\pm 1$  dB: 20 Hz to 24 kHz; Marantz, New York,  
422 NY, USA) and a ME-62 omnidirectional microphone ( $\pm 2.5$  dB: 20 Hz to 20 kHz; Sennheiser,  
Wedemark, Germany), as described in a previous study [20]. Three playback sequences were  
424 used (each using sound from a different peacock), with mean rattle repetition rates of  $26.7 \pm 0.5$   
Hz;  $25.3 \pm 0.5$  Hz; and  $24.6 \pm 0.5$  Hz. Recordings of train-rattling in the field indicated that  
426 rattles are in-phase (i.e., temporally coherent) over bouts approximately 1.2 s duration that are  
repeated for several minutes during displays [18,20]. We spliced together bouts with an integer  
428 number of rattling periods to form a longer audio playback file with a total duration of  
approximately 5 min.

# PREPRINT VERSION

430

All sound files were played back on a Lenovo Thinkpad T460S computer connected to a 402-  
432 VLZ4 mixer (Mackie; preamplifier; < 0.0007% distortion 20 Hz to 50 kHz) and a ROKIT 10-3  
G3 10" powered studio monitor (KRK Systems, Fort Lauderdale, Florida, USA;  $\pm 2.5$  dB over to  
434 40 Hz to 20kHz,  $-10$  dB at 25 Hz relative to  $\geq 40$  Hz) with a 25.4 cm diameter subwoofer ( $A =$   
12.7 cm). Following [83], we examined re-recordings of the playback stimuli made with the  
436 same microphone and recorder used for the original field audio recordings, and found that the  
resulting waveforms and spectrograms (e.g., S2 Fig) had the same temporal features (“rattle”  
438 notes) as the original field recordings of train-rattling (e.g., Fig 4A in [20]).

440 As a control, we played back a Gaussian white noise file generated using MATLAB’s innoise  
command (5 min. duration, 24-bit, 44100 Hz, FFT amplitude flat from < 1 Hz to 22,000 Hz  
442 computed using a rectangular window to preserve Fourier amplitudes). The white noise  
playback assessed whether the crest samples could be driven to vibrate measurably by a  
444 broadband signal similar to the train-rattles, but lacking the low-frequency amplitude modulation  
of the train-rattling recording at the “rattle” repetition rate. The root-mean-squared (rms)  
446 amplitudes of all playback recordings and the white noise control were scaled to the same value  
while also ensuring that no clipping occurred at high amplitude.

448

For playback experiments, the preamplifier volume controls of the mixer were adjusted so that  
450 the mean playback SPL was  $88 \pm 1$  dB at 3 m as measured by a Type 2 model R8050 sound level  
meter (accuracy  $\pm 1.4$  dB, C-weighting, 30-100 dB, slow 1.0 s setting; Reed Instruments,  
452 Wilmington, NC USA). For comparison, previously-reported values for peacock train-rattling

# PREPRINT VERSION

mechanical sounds corrected for background noise were given as 67 to 77 dB at  $R = 3$  m

454 (unweighted SPL) [19], similar to audible bird wingbeat SPL summarized in S2 Table. Based on  
the frequency response specifications for our microphone and playback system, we estimated  
456 their combined response at 26 Hz to be reduced by 12.5 dB compared to the audible range; the  
increase in playback SPL relative to the reported values accommodates for this attenuation.  
458 During playbacks, the background noise with no audio was  $58 \pm 1$  dB SPL.

460 Another consequence of the broadband nature of train-rattling is that rapid intensity variations  
due to interference at small  $R$  (the “interference near-field”) should not be relevant for this  
462 display, because this effect depends on the superposition of sound waves with a well-defined  
frequency emitted by different parts of an extended source. The predicted interference near-field  
464 regime is  $R < 2\pi A^2/\lambda = 0.7$  cm for 26 Hz [32]. Consistent with this expectation, we found no  
variation due to interference when we measured SPL at nine different positions across the  
466 subwoofer speaker between the center and edges, at distances perpendicular to the speaker  
between 12.7 cm to 0.5 m.

468  
Female crest samples ( $n = 3$ ; crests 7, 8, 15) with resonant responses determined in the  
470 vibrational dynamics trials were mounted on a tripod at a distance  $R = A = 12.7$  cm away from  
the subwoofer speaker face to give optimal exposure to the flow near-field (S2 Fig). Vibrational  
472 motion of the samples was measured for three separate trials per crest and per recording using  
high-speed video (reducing speaker volume to zero and waiting  $> 5$  s in between trials), and the  
474 crest motions were tracked and analyzed from video using the methods described above. The  
duration of train-rattling bouts gave an FFT frequency resolution of  $\pm 0.50$  Hz for vibrational

# PREPRINT VERSION

476 response analysis. To minimize direct mechanical coupling via the substrate, the crest samples  
and speaker were mounted on Sorbothane™ vibration-isolation pads. Because peacocks often  
478 display near the edges of thick vegetation, next to natural ground slopes, or next to hard walls  
[84; personal observation], anechoic conditions are not required for effective courtship displays  
480 or for simulating their mechanical sounds. However, we still chose to minimize reverberations  
by surrounding the experiment with acoustic tiles and sound absorbing sheets (Audimute,  
482 Cleveland, OH USA; audible sound reduction rating: SAA 0.68, NRC 0.65), resulting in an SPL  
decrease of 5 dB when distance was doubled for  $R \geq 0.25$  m. This decrease in SPL is  
484 intermediate between the free-field value of 6 dB and a typical reflective room value of 3 dB  
[85]. We also performed negative controls to ensure that reverberations and substrate vibrations  
486 did not drive crest vibrations. This was accomplished by inserting a foam tile between the crest  
samples and the speaker to block particle velocity oscillations and attenuate directional sound  
488 pressure waves from the speaker. Thus, any crest vibrations measured during the controls would  
be due to substrate vibrations, reverberations, transmitted sound pressure waves, and/or other  
490 environmental sources.

## 492 **Simulated wing-shaking experiments**

High-speed videos from a previous study were used to determine the frequency and amplitude of  
494 wing motions during the peacock's wing-shaking display [20]. We used four videos filmed with  
the wingtip motion closely aligned with the image plane (see S1 Movie) that also showed tail  
496 feathers with known lengths. The amplitude of wing-shaking motion was defined by the mean  
diameter of motion circumscribed by the tips of the partly-unfurled wings during this display,  
498 which we estimated to be 7.6 cm on average (range 5.5 to 10 cm). To simulate the wing motions

# PREPRINT VERSION

observed in displaying peacocks and the resulting air motions, we used a robotic mechanism that  
500 caused an entire peacock wing to flap with the wing plane held in a fixed vertical orientation  
while the wingtip circumscribed a circle (S1 Movie and S3 Fig). The peacock wing was  
502 mounted on a carbon fiber rod using a balsa wood base that was attached to the wing via  
adhesive at the shoulder; this rod pivoted about a clevis joint, which allowed the wing axis to  
504 move in a vertical circle while the wingspan remained in the vertical plane. At the end opposite  
the wing, the rod was attached to a circular crank by a universal joint. The crank and attached  
506 wing assembly was driven at  $4.95 \pm 0.05$  Hz by a DC motor. To account for the fact that actual  
wing-shaking involves motion of two wings toward each other, which presumably displaces  
508 more air than a single wing, this apparatus used a single flapping wing moving in a slightly  
larger diameter (14 cm) circle at the wingtips.

510

To determine how wing-shaking influences the crest of an observing bird, we first determined  
512 the location of maximal airflow speed during robotic wing-shaking. Airflow speeds were  
measured by a model 405i Wireless Hot-wire Anemometer (Testo, Sparta, NJ, USA) oriented  
514 with its sensor facing in the same direction as the crest samples; this device has a resolution of  
0.01 m/s, accuracy of 0.1 m/s, measurement rate of 1 Hz, and equilibration time of  
516 approximately 5 s. To define the airflow pattern around the flapping wing, air speed was  
sampled at every point on a 5 cm grid, 5-7 times per location. Based on these results, we  
518 determined the angle at which to position the crest sample. S3 Fig shows how three peahen  
feather crest samples (Crests 08, 12, and 13) were positioned using a tripod at the vertical  
520 midline of the wing located at various distances from the wing-tips. The resulting motion of the  
crests was then filmed using high-speed video as described above in “Video analysis” to quantify

# PREPRINT VERSION

522 the vibrational response of the three peahen crests. To verify that substrate vibrations did not  
drive the crest motion, we also performed a control by inserting a 3 x 4 ft foamboard in between  
524 the crest and wing to block the airflow from the wing motion; this reduced the root-mean-  
squared crest motion to 14% of its value with wing motion-induced airflow present. For  
526 comparison with the wing-shaking frequency during displays, flapping frequencies during  
ascending and level flight were also measured for 9 peacocks from 6 online videos (S3 Table).

528

## **Force measurements**

530 Peacock feather keratin, like other biopolymers, can have a nonlinear elastic response to external  
stresses [86]. Because the stimuli in the mechanical shaker, audio playback and wing-shaking  
532 experiments each exerted different forces and these forces may have had greater magnitudes than  
those encountered in the field, we wanted to understand how to extrapolate from our laboratory  
534 experiments to a lower force regime that is potentially more biologically relevant. Consequently,  
we measured the elastic mechanical response of peafowl crests to an external bending force  
536 applied to the flags of the crest. We studied the static mechanical response of peafowl crests in  
the single cantilever bending geometry by measuring the relationship between flag displacement  
538 and restoring force of the crest in the out-of-plane orientation (Fig 1D). Force measurements  
were made using a Model DFS-BTA force sensor (accuracy  $\pm 0.01$  N) connected to a LabQuest2  
540 datalogger (Vernier Software & Technology, Beaverton, OR, USA), which was calibrated using  
known masses. The force sensor was attached to a thin rectangular plastic blade oriented in the  
542 horizontal plane. The edge of the blade was pressed against the midpoint of the flags of the  
vertically oriented crest to measure the restoring force exerted by the bent crests. The crests  
544 were mounted on a micrometer that moved them toward the force sensor and enabled



# PREPRINT VERSION

measurement of crest displacement relative to the location at which the crest flag first deformed  
546 and the restoring force first became non-zero within measurement error. These measurements  
were performed for three trials each for three male and three female crest samples. The resulting  
548 force vs displacement data were fit to a linear force-displacement model to determine the  
linearity of elastic bending deformations. This also gave a value of the bending spring constant,  
550 k.

## 552 **Statistical analysis**

All measurements and fitted values are reported as means [95% confidence interval, defined as  
554  $1.96 \times \text{s.e.m.}$  for normally distributed data], unless noted otherwise. To analyze sources of  
variation in whole crest  $f_r$  and  $Q$ , we fit Gaussian linear mixed-effects models with a random  
556 intercept of crest ID to account for repeated measures of each bird's crest using the nlme 3.1-131  
package [87] in R 3.3.3 [88]. We first verified that trial order and frequency sweep rate, two  
558 aspects of the experimental design, did not have significant effects on either  $f_r$  or  $Q$  (all  $p > 0.28$ ).  
The next step was to evaluate the potential effects of morphological traits that could influence  
560 crest resonance (some of which could be weakly correlated in a much larger study; see [17]).  
Because our sample size was only 15 crests, but we had five morphological traits, our statistical  
562 power was only sufficient to consider models with only one morphological trait predictor at a  
time: length, width, number of feathers, percent of unaligned feathers, and percent of short  
564 feathers. These morphological traits were fitted as fixed effect predictors. All models also  
included fixed effects of sex as well as the vibration orientation (either in-plane, or out-of-plane).  
566 We used AICc to select the best-fit model [89] and evaluated significance of the fixed effects  
using Wald tests. We report  $R^2_{\text{LMM}(m)}$  as a measure of the total variance explained by the fixed

# PREPRINT VERSION

568 effects [90,89]. We also used the variance components of the best-fit model to calculate the  
adjusted repeatability, defined as the variance attributed to differences among crests after  
570 adjusting for variation explained by the fixed effects [91]. Inspection of the data and model  
residuals revealed that variance in  $f_r$  differed among crests, so when modelling  $f_r$ , we fit a  
572 heteroskedastic model that had its standard errors adjusted to account for the appropriate within-  
group error variance, by using the varIdent option in the weights argument in nlme [87].

574

## Results

### 576 Morphology

A microscopic examination of peafowl crest feathers reveals that their shafts have associated  
578 feathers with the structure of filoplumes at the base (Fig 1E) that agree in location and  
morphology with those shown in micrographs of filoplumes cited earlier in the Methods. These  
580 were structurally distinct from immature crest feathers, which also retained a sheath until they  
had grown to a length much greater than that of the filoplumes.

582

The average lengths of the whole crest samples used in this study were 5.3 [4.8, 5.7] cm for 8  
584 female crests, and 5.4 [5.1, 5.7] cm for 7 male crests. Fig 2 shows that this range of crest lengths  
agrees with that of live peafowl, indicating that the crest samples used in these experiments were  
586 fully grown [17]. The average widths of the whole crest samples were 5.5 [4.6, 6.3] cm for the  
female crests, and 6.1 [5.3, 6.9] cm for the male crests. These width values were approximately  
588 20% (female) to 27% (male) smaller than those found on live birds (Fig 2). This difference  
could be due to the crest ornament being spread 1-2 cm more in the sagittal plane by muscle

# PREPRINT VERSION

590 action in the live bird, as observed for erectile crest plumage in many other species [13], in  
addition to the effect of skin drying.

592

## **Fig 2. Length and width of the whole crest samples as compared to live peafowl crests.**

594 Crests (n = 8 female, n = 7 male) measured *in vivo* (means shown to the right of each data  
column) had similar morphology to the dried samples, except that the crests on live birds tended  
596 to be wider. Dried sample dimensions were measured to the nearest 0.1 cm. Each crest sample  
is indicated by a unique symbol-color combination consistent with other figures (see S4 Table  
598 for details).

600 All 7 of the male crest samples had feathers of uniform length, defined as  $\pm 8\%$  of the mean fully-  
grown crest feather length. This is also typically observed *in vivo*, where 72% of male *P.*  
602 *cristatus* crests studied in [17] had feathers of uniform length. In contrast, the majority (6/8, or  
75%) of the female crest samples had non-uniform feather lengths (using the same definition  
604 above), which was again similar to the previous *in vivo* study, where 77% of females had non-  
uniform crest feather lengths [17]. On average, the dried female crests had 7.0% [2.1, 11.8] of  
606 their feathers shorter than the mean fully-grown crest feather length. Eight out of the 15 crest  
samples had all feathers oriented in the same plane within  $\pm 5^\circ$ ; five of the crests had 7-11% of  
608 the feathers unaligned, and two male crests had 22% and 50% unaligned feathers, respectively.

610 We also studied the morphology of individual peafowl crest feathers to understand their unusual  
structure (Fig 1C). The average rachis tapered evenly over its 39.90 [38.89, 40.91] mm length  
612 and had a mass of 5.1 [4.8, 5.3] mg, and the plume (or flag) added another 2.50 [0.87, 4.06]

# PREPRINT VERSION

mg. Unlike the fully formed barbs in the pennaceous flag, the lower barbs were short (4.1 [3.0,  
614 5.2] mm) and lacked barbules altogether.

## 616 **Vibrational dynamics measurements**

The vibrational drive transfer functions of peafowl crests had either a single dominant  
618 fundamental peak, or in a few cases, a cluster of two to three peaks in a narrowly-defined  
frequency range, with no evidence that other modes of vibration caused detectable motions of the  
620 pennaceous flags. The functional form of each main spectral peak agreed well with the  
Lorentzian (mean adjusted- $R^2 = 0.97$ ; range [0.91, 0.998]) (Eq 1) predicted for a cantilever [92],  
622 indicating that the system responded in the linear regime for our shaker amplitudes and  
frequency sweep rates (Fig 3A). The value of  $f_r \pm \Delta f/2$  defines the approximate range of drive  
624 frequencies over which power is efficiently coupled into the oscillator. Fig 3B shows that  
shaking frequencies measured in the field for displaying male and female peafowl [20] lay within  
626  $f_r \pm \Delta f/2$  of the crest resonant frequency for both sexes ( $n = 8$  female crests and 7 male crests).  
When the shaking force was oriented out-of-plane, the mean crest resonant frequency,  $f_r$ , was  
628 28.1 [28.0, 28.1] Hz for female and 26.3 [25.9, 26.6] Hz for male crests, respectively. The mean  
 $\Delta f$  values were 6.2 [4.4, 8.0] Hz (females) and 4.3 [4.2, 4.4] Hz (males).

630

### **Fig 3. Vibrational resonance properties of peafowl crests and individual crest feathers. (A)**

632 Vibrational spectrum and Lorentzian fit for peacock crest sample Crest 01. (B-D) Data on the  
mean crest resonant frequencies,  $f_r$ , and quality factors,  $Q$ . Each dried crest sample ( $n = 8$   
634 female,  $n = 7$  male) is indicated by a unique symbol-color combination, consistent with Fig 2.

(B) The mean resonant frequencies,  $f_r$ , of the crest are a close match for the range of vibrational

# PREPRINT VERSION

636 frequencies used during peafowl social displays. As an indication of measurement error, the  
average 95% CI for each mean  $f_r$  estimate spans 0.072 Hz. The gray shaded area is the range of  
638 vibrational frequencies of the train-rattling display, with dotted lines showing the means for  
displays performed by peacocks (blue) and peahens (green) [20]. Variation in  $f_r$  was influenced  
640 by the vibrational orientation and was also associated with the sex of the bird, but there was no  
significant association with the area of pennaceous flags at the top of the crest. The first panel in  
642 (B) also shows how a small sample of single crest feathers ( $n = 3$  from male Crest 03,  $n = 5$  from  
male Crest 05, and  $n = 3$  from female Crest 10) had a similar range of resonant frequencies as the  
644 whole crests vibrated in the same out-of-plane orientation. (C) Fundamental frequency for  
vibrations in the out-of-plane orientation for peafowl crest and non-crest feathers with similar  
646 lengths and crest feathers from four non-peafowl species described in S1 Table and S1 Fig.  
Means for male and female peafowl crests are both plotted. The y-axis of (C) is aligned with  
648 that of (B) for comparison. (D) The mean quality factor,  $Q$ , was also influenced by the  
vibrational orientation, and was associated with the sex of the bird and the area of pennaceous  
650 flags. The average 95% CI for each mean  $Q$  estimate spanned 0.233. Black horizontal lines in  
(B) and (D) are grand means.

652

The repeatability of  $f_r$  for whole crests was very high at 92% (95% confidence interval, 87-94%),  
654 demonstrating strong and consistent differences among individual crests (Fig 3B). Analysis of  
the sources of variation in  $f_r$  indicated that 28% of the total variation in  $f_r$  could be explained by  
656 sex, crest orientation, and the total area of the pennaceous flags (Fig 3B; see S5 Table for the  
best-fit model). The effect of crest orientation was strong and significant, such that out-of-plane  
658 vibrations have  $f_r$  values approximately 2.4 Hz higher on average ( $p < 0.0001$ ), whereas the sex

# PREPRINT VERSION

660 difference was not significant ( $p = 0.86$ ) and crests with reduced flag area have a slight but non-  
662 significant tendency to have higher  $f_r$  values ( $p = 0.10$ ). Crest length, width, number of feathers,  
664 and the percent of unaligned and short feathers did not explain variation among crests in the  
666 value of  $f_r$ . The frequency response of individual crest feathers was generally consistent with  
668 that of the whole/intact crests, as the resonant frequencies of these feathers in the out-of-plane  
670 orientation ranged from 19.2 Hz to 32.4 Hz (Fig 3B).

666 Fig 3C compares the fundamental frequency of out-of-plane vibrations vs rachis length for  
668 peafowl crests and individual crest feathers, three other types of short peacock feathers, and crest  
670 feathers for four other species of birds. These data show that that the resonant frequencies of  
672 peafowl crests do not agree within measurement uncertainty with those of three other types of  
674 peafowl feathers, nor do they agree with those of crest feathers from four other bird species, even  
676 when the dependence of frequency on rachis length is taken into account.

672 Fig 3D shows that the mean quality factor  $Q$  for peafowl crests vibrated in the out-of-plane  
674 orientation (4.8 [4.0, 5.6] for females, 6.2 [5.6, 6.9] for males) was intermediate between that of  
676 peafowl eyespot feathers ( $Q = 3.6-4.5 \pm 0.4$  and  $1.8 \pm 0.3$ , for individual feathers and feather  
678 arrays, respectively) and the tail feathers that drive the shaking, for which  $Q_l = 7.8 \pm 0.5$  [20].  
This indicates that peafowl crests are moderately sharply-tuned resonators.

678 The repeatability of  $Q$  was estimated at 47% (95% confidence interval, 17-55%), indicating  
680 moderate differences among crests in  $Q$ . Approximately 49% of the variation in crest  $Q$  could be  
explained by sex, crest orientation, and the total area of the pennaceous flags (Fig 3D, see also

# PREPRINT VERSION

682 S5 Table). Male crests were significantly more sharply-tuned than those of females ( $p < 0.005$ ),  
and crests that had less flag area tended to be more sharply-tuned ( $p = 0.04$ ). Peafowl crests also  
684 have more sharply-tuned resonance when they are vibrated out-of-plane ( $p < 0.0001$ ) as  
compared to the in-plane orientation.

686

Note that the complete analysis of vibration data can be reproduced using data and code

688 available at: <https://doi.org/10.6084/m9.figshare.5451379.v5> [70].

## 690 **Force impulse experiments**

When ring-shaped air vortices impacted the crests, the barbs responded with clearly visible  
692 motion on video with the average amplitude of motion at the flags of 9.4 [4.3, 14.4] mm (Fig  
4A). Analysis of the crest vibrational motion vs time revealed an exponentially decaying  
694 sinusoidal response; the mean natural frequency,  $f_o$ , measured by the force impulse method  
agreed to  $\leq \pm 0.4 \Delta f$  of the value of  $f_o$  predicted by Eq 2 using values of resonant frequency,  $f_r$ ,  
696 and  $Q$  measured using sinusoidal forces and frequency sweeps (Fig 4B). Thus, vortices cause  
the feather crest to vibrate at its natural frequency, with a decrease in amplitude of 13% after 0.2  
698 s, the approximate period of peafowl wing-shaking displays.

700 **Fig 4. Displacement of the crest in response to air vortices.** (A) Time series showing the  
change in flag position after a peacock crest (Crest 09) was impacted by a moving vortex of air.

702 When peafowl crests were impacted by such air ring vortices, they deflected measurably,  
oscillating at their resonant frequency with an amplitude that decayed to a few percent of the

704 initial value over the period of the peacock's wing-shaking display. (B) Mean resonant

# PREPRINT VERSION

frequencies ( $f_r$ ) and mean vortex response frequencies ( $\pm 95\%$  CI) for three crests in the vortex  
706 experiment.

## 708 **Audio playback experiments**

Fig 5A shows a waveform and spectrogram of a recording of train-rattling played back using the  
710 audio equipment in the playback experiment (see also S2 Fig). An example FFT power spectrum  
for the vibrational response of a peahen crest sample during audio playback is shown in Fig 5B.  
712 For train-rattling audio playback experiments in which the peahen crest samples were located in  
the flow near-field of the speaker, the vibrational power spectra of the samples had a peak well  
714 above noise near the playback train-rattling repetition rate (the effective drive frequency).

However, when the white noise recording was played back, the spectral power near the drive  
716 frequency was  $< 4.3\%$  of that found during playbacks. The peak frequency of crest vibrations  
agreed with the playback train-rattling repetition rate to within 95% CI for all measurements but  
718 one, for which it lay within 2.5 s.e.m. Measurements of crest vibrations made with an acoustic  
foam tile between the speaker and sample had  $< 11\%$  of the FFT spectral power at the drive  
720 frequency compared to measurements made without the foam; this value placed an upper bound  
on the contribution of background sources (e.g., room reverberations, substrate vibrations, etc.)  
722 that were not associated with particle-velocity oscillations from the playback stimulus.

724 **Fig 5. Effect of audio playback on crests.** (A) An example waveform and spectrogram of the  
train-rattling sound used in the playback experiment. The white box in (B) highlights a single  
726 rattle note in the train-rattling spectrogram. (B) Vibrational response of a peahen crest (Crest 08)  
exposed to audio playback in the near-field of the speaker. The FFT spectral power during



# PREPRINT VERSION

728 playback of train-rattling sound (dotted line, plotted on a linear scale on the y-axis) has a peak  
near the resonant frequency of the crest. The spectral power values recorded during white noise  
730 playback (solid line) and when the train-rattling audio was blocked by a foam tile (red dashed  
line) are also shown.

732

## **Simulated wing-shaking experiments and wing-flapping during**

734 **flight**

The simulated wing-shaking experiment resulted in an airflow pattern with speeds  $\leq 0.3$  m/s.

736 We used the measured positions of maximum airflow speed to determine the locations for three  
female crest samples for vibrational motion studies. The FFT power spectra of the crest flag  
738 vibrational motion had a single peak above the background noise at a frequency that agreed with  
the wing-shaking frequency within 95% CI (Fig 6) for distances up to 90 cm (one sample) and  
740 80 cm (two samples) from the mean wingtip position.

742 **Fig 6. Effects of simulated wing-shaking displays.** Vibrational response of a female peahen  
crest (Crest 13) exposed to airflow from a robot that simulated 5.0 Hz peacock wing-shaking  
744 displays at a distance 50 cm from the moving wingtip (see also S3 Fig). Note that the FFT  
spectral power (y-axis) is plotted on a linear scale.

746

The average peacock wing-flapping frequency during ascending and level flight was 5.5 [5.0,  
748 6.1] Hz (S3 Table). This frequency agrees with the average frequency of 5.4 Hz (range of  
individual bird means = 4.5-6.8 Hz) found for wing-shaking display frequencies measured in the  
750 field [20].

# PREPRINT VERSION

## 752 **Mechanical bending properties**

All feather crests exhibited a highly linear elastic response in the bending experiments: force and  
754 displacement were linearly related for displacements up to 10.1 [9.1, 11.0] mm (adjusted  $R^2 =$   
0.983 [0.978, 0.989]. This allowed us to compute the bending spring constant,  $k$ , from the fitted  
756 slopes (S4 Fig). The mean bending spring constants for the individual crests ranged from 0.0022  
to 0.0054 N/mm with a measurement repeatability of 47% (95% confidence interval, 0-54%) due  
758 to the force sensor contacting the crest flag at somewhat different positions during different  
trials.

760

## **Discussion**

762 The fundamental vibrational resonant frequencies of peafowl crests were found to agree closely  
with the frequencies used during male train-rattling and female tail-rattling displays in Fig 3B.  
764 By contrast, these display frequencies do not agree with the resonant frequencies found for  
feathers of similar length from other parts of the peafowl's body, or with those found for the  
766 crest feathers of four other bird species in Fig 3C, which collectively span a frequency range that  
is nearly seven times that of the observed range of rattling displays. This means that the close  
768 frequency match between peafowl displays and crest resonance is not due simply to species, type  
of feather (i.e., crest vs. tail), or rachis length. This finding agrees with prediction P2 (Box 1)  
770 that crest feathers with a mechanosensory function would have a frequency response tuned to  
match stimuli with a well-defined frequency.

772

# PREPRINT VERSION

Our results also indicate that both the resonant frequency and the  $Q$  factor of the peafowl crest's  
774 vibrational response should agree with those of the array of tail and train feathers that produce  
the shaking display, which have been previously characterized in [20]. This implies that the  
776 peafowl's crest would be well-matched to the train's mechanical sound, but not to environmental  
sources of noise [31]. In agreement with prediction P4 (Box 1), we also found that exposing  
778 peahen crest samples to the near-field of audio playbacks of train-rattling sounds caused the  
crests to vibrate detectably on video at their resonant frequency (Fig 5B). By contrast, exposing  
780 crest samples to white noise resulted in no measurable vibrations above background noise levels.  
We therefore hypothesize that this match of vibrational resonant properties might have functional  
782 significance during multimodal courtship displays that generate mechanical sound.

784 As found for live birds [17], the peafowl crest samples had relatively uniform lengths and  
numbers of feathers (Fig 2). While our crest samples had slightly lower flag area than fully  
786 spread crests of living birds, we found that individual crest feathers had similar vibrational  
responses to those of entire crests, indicating that interactions between crest feathers is not the  
788 main determinant of resonant frequency. This indicates that the results of our vibrational  
dynamics experiments are also applicable to crests *in vivo*, on the live bird.

790  
Peafowl crests do not have a resonant frequency near the 5.4 Hz rate of wing-shaking displays.  
792 However, we still found that peafowl crests vibrated detectably in response to impulsive airflows  
similar to those produced during wing-shaking (prediction P3; Box 1). By measuring the  
794 deflection of peafowl crests when they were struck by individual air ring vortices (Fig 4), we  
found that each impulsive stimulus generated a distinct crest response in which the crest feathers

# PREPRINT VERSION

796 briefly vibrated at their natural frequency, before decaying to zero in a time comparable to that of  
the wing-shaking period. This result provided independent validation of the resonant frequency  
798 of crests, measured from the spectral responses in Fig 3. It also means that periodic but isolated  
force impulses generated by the wing-shaking display are effectively experienced as distinct  
800 stimuli that cause the crest to oscillate only briefly near resonance, akin to an infrequently struck  
bell. Further confirming this interpretation, we found that airflows due to simulated wing-  
802 shaking at distances from the crest  $\leq 90$  cm drove measurable transient crest deflections (Fig 6),  
similar to the minimum male-female distances in the field during such displays. The linearity of  
804 the measured elastic response also suggests that this result can be extrapolated to greater  
distances. These findings imply that the airflow impulses generated by *in vivo* wing-shaking  
806 displays could stimulate the feather crests of nearby female by producing a series of distinct  
vibrational responses.

808

Our measurements of vibrational responses during audio playback were limited to relatively  
810 large amplitudes and small distances compared to the very small thresholds found for other  
mechanoreceptors *in vivo*, and consequently to relatively small source-receiver distances.  
812 However, the low thresholds found for mechanosensation *in vivo* suggest that the actual  
detection range could be much greater than our *in vitro* limits. For example, pigeons can detect  
814 submicron threshold vibrational amplitudes applied to flight feathers [93,94], mammalian hair  
cells are sensitive to sub-nanometer displacements and 0.01 deg rotations [95], tactile receptors  
816 in human skin are sensitive to submicron vibrational amplitudes [96], and insect filiform hairs  
are sensitive to airspeeds as low as  $0.03 \text{ mm s}^{-1}$  [97]. This idea also is supported by our  
818 measured linear elastic response of feather crests to bending (S4 Fig), which indicates that our

# PREPRINT VERSION

820 results can be extrapolated linearly to lower magnitude stimuli corresponding to larger source-  
sample separation than those measured here during the audio playback experiments. Our  
microscopy results confirmed that peafowl crest feathers have feathers at their bases with the  
822 morphology expected for filoplumes (prediction P1; Box 1). However, further histological and  
electrophysiological studies of the receptors at the base of avian crest feathers and their  
824 associated filoplumes are needed to determine whether these crests can in fact function as  
sensors that are sensitive to airborne stimuli like the ones studied here.

826  
Given that feathers are known to function as airflow sensors during flight, it is easy to imagine  
828 how they also could be adapted to function as sensors during social signaling. For example,  
during social displays, many birds flap or vibrate their wings or tails [66,67,98,99,20], producing  
830 dynamic visual stimuli as well as mechanical sound and periodic air flow stimuli. Thus, these  
multimodal displays have the potential to stimulate multiple senses, including vision, hearing,  
832 and vibrotactile perception. Several non-exclusive scenarios could provide a functional benefit  
of such a close frequency match. For example, we can hypothesize that air-borne stimuli  
834 generated by train- or tail vibrating or shaking displays provide females with an indication of  
male muscle power and endurance, or that stimuli generated by wing-shaking displays serve as  
836 signals of flight muscle performance [99]. Another hypothesis is that male displays have been  
selected to match and stimulate pre-existing mechanosensory properties of the female crest,  
838 without any benefits to females of this close match. Yet another hypothesis is that both males  
and females experience crest vibrations driven by body oscillations due to their own train- and  
840 tail-rattling displays as a form of proprioception. Conversely, our measurements do not support

# PREPRINT VERSION

a visual display function for peafowl feather crest vibrations because the resulting amplitudes of  
842 a few mm at most are unresolvable given limitations due to the peafowl's visual acuity [20].

844 Although we have demonstrated here that peafowl crest feathers are effectively stimulated by  
airborne stimuli during social displays, we do not yet know whether this has behavioral or social  
846 significance. Testing this hypothesis requires *in vivo* behavioral experiments. Crest vibrations  
are challenging to measure directly, given that both sexes move frequently during displays and  
848 are viewed against complex visual backgrounds. Instead, a first step in peafowl could be to  
blindfold females and test whether airborne stimuli at the socially salient frequencies elicit a  
850 behavioral response. Further experiments could test the function of the crest during male  
courtship displays by removing or altering the female crest and then examining how females  
852 respond to male displays. One way to do this would be to apply a thin coat of clear varnish to  
the rachis of the crest feathers; this would stiffen the rachis and increase resonant frequency  
854 without affecting the crest's visual appearance (i.e., size or flag iridescence). Similar  
manipulations could also test whether peacocks use proprioception from the crest to modulate  
856 their own vibration displays. The movement of females during displays could also be examined  
in relation to the airflow patterns generated by wing-shaking peacocks, to test whether female  
858 movements are correlated with specific airflows generated by the males. These correlative  
results could then be tested experimentally by measuring the behavioral response of peahens to  
860 oscillatory air flows modulated at frequencies close to and distinct from their crest resonance, to  
see how this influences attention and body orientation. Because audible sound cues are  
862 omnidirectional, these responses could be distinguished from hearing-induced behaviors by

# PREPRINT VERSION

comparing results when air flows are directed toward and away from specific regions of the  
864 birds' plumage.

866 The biomechanical properties of the peafowl's crest also suggest a novel design for making  
sensitive biomimetic detectors for sensing impulsive or periodic airflows. Such devices are  
868 required for proposed robotic applications of air vortex rings and other airflow signals as a  
communication channel [100]. The addition of an extremely lightweight pennaceous flag to a  
870 cantilever made from a resistance-based flex sensor would enable the flex sensor to experience a  
large torque from a small force, with a minimal increase in mass.

872

Thus far, the elaborate shape, size and color of many bird feather crests has led to an emphasis  
874 on their visual appearance [14]. However, many avian courtship displays also involve wing-  
shaking, tail-fanning and mechanical sound production that may be detected by nearby females  
876 in the vibrotactile channel. For example, we have compiled a list of at least 35 species  
distributed in 10 avian orders that have crests and perform these types of displays (S6 Table).

878 Given the growing interest in multisensory signaling, it seems worth pursuing behavioral studies  
to investigate whether mechanosensory stimulation enhances the reception of visual and acoustic  
880 cues during this multimodal display. The close match between the resonant frequencies found  
here for peafowl crests and this species' social displays suggest that it is time to explore the  
882 hypothesis that birds receive and respond to vibrotactile cues in a wider variety of scenarios.

# PREPRINT VERSION

## **Acknowledgments**

884 We are grateful to Maarten Hesseling for assistance with preliminary vibrational measurements,  
Robert Beyer, Robert Lukasik, and Roger Hill for help with instrumentation design and  
886 construction, Kate Davidson (Siskiyou Aviary) and James Hare for feather samples, and Robert  
Koch, Holger Klinck, and Carr Everbach for advice about reproducing low repetition rate  
888 sounds. We thank two anonymous reviewers and James Hare for helpful comments on an earlier  
version of the manuscript.

890

## **Competing interests**

892 The authors declare no competing or financial interests.

## **Author contributions**

Conceptualization: S.A.K.; Methodology: S.A.K., D.V.; Investigation: S.A.K., D.V.; Data  
896 curation: S.A.K., D.V., R.D.; Analysis: S.A.K., R.D., D.V.; Writing – original draft: S.A.K.,  
R.D.; Writing – review & editing: S.A.K., R.D., D.V.

898

## **Funding**

900 This work was supported by Haverford College and a National Sciences and Engineering  
Research Council of Canada (NSERC) Postdoctoral Fellowship to R.D.

902

## **Data availability**



# PREPRINT VERSION

904 All data and code necessary to reproduce the results of this study are available at:

<https://doi.org/10.6084/m9.figshare.5451379.v5>

# PREPRINT VERSION

## 906 **References**

- 908 1. Saxod R. Development of Cutaneous Sensory Receptors Birds. *Development of Sensory Systems*. Berlin: Springer; 1978. pp. 337–417. doi:10.1007/978-3-642-66880-7\_8
- 910 2. Necker R. Observations on the function of a slowly-adapting mechanoreceptor associated with filoplumes in the feathered skin of pigeons. *J Comp Physiol A*. 1985;156: 391–394. doi:10.1007/BF00610731
- 912 3. Brown RE, Fedde MR. Airflow sensors in the avian wing. *J Exp Biol*. 1993;179: 13–30.
- 914 4. Bilo D, Bilo A. Wind stimuli control vestibular and optokinetic reflexes in the pigeon. *Naturwissenschaften*. 1978;65: 161–162. doi:10.1007/BF00440356
- 916 5. Bilo D, Bilo A. Neck flexion related activity of flight control muscles in the flow-stimulated pigeon. *J Comp Physiol*. 1983;153: 111–122. doi:10.1007/BF00610348
- 918 6. Cunningham SJ, Alley MR, Castro I. Facial bristle feather histology and morphology in New Zealand birds: Implications for function. *J Morphol*. 2011;272: 118–128. doi:10.1002/jmor.10908
- 920 7. Brücker C, Schlegel D, Triep M. Feather vibration as a stimulus for sensing incipient separation in falcon diving flight. *Nat Resour*. 2016;07: 411. doi:10.4236/nr.2016.77036
- 922 8. Persons WS, Currie PJ. Bristles before down: A new perspective on the functional origin of feathers. *Evolution*. 2015;69: 857–862. doi:10.1111/evo.12634
- 924 9. Lindow BEK, Dyke GJ. Bird evolution in the Eocene: climate change in Europe and a Danish fossil fauna. *Biol Rev*. 2006;81: 483–499. doi:10.1017/S146479310600707X
- 926 10. Li Q, Gao K-Q, Vinther J, Shawkey MD, Clarke JA, D’Alba L, et al. Plumage color patterns of an extinct dinosaur. *Science*. 2010;327: 1369–1372. doi:10.1126/science.1186290
- 928 11. Burley NT, Symanski R. “A taste for the beautiful”: Latent aesthetic mate preferences for white crests in two species of Australian grassfinches. *Am Nat*. 1998;152: 792–802. doi:10.1086/286209
- 930 12. Jones IL, Montgomerie R. Least auklet ornaments: do they function as quality indicators? *Behav Ecol Sociobiol*. 1992;30: 43–52. doi:10.1007/BF00168593
- 932 13. Hagelin JC. The kinds of traits involved in male-male competition: a comparison of plumage, behavior, and body size in quail. *Behav Ecol*. 2002;13: 32–41. doi:10.1093/beheco/13.1.32
- 934 936

# PREPRINT VERSION

- 938 14. Seneviratne SS, Jones IL. Mechanosensory function for facial ornamentation in the whiskered auklet, a crevice-dwelling seabird. *Behav Ecol.* 2008;19: 784–790. doi:10.1093/beheco/arn029
- 940 15. Seneviratne SS, Jones IL. Origin and maintenance of mechanosensory feather ornaments. *Anim Behav.* 2010;79: 637–644. doi:10.1016/j.anbehav.2009.12.010
- 942 16. Sullivan TN, Wang B, Espinosa HD, Meyers MA. Extreme lightweight structures: avian feathers and bones. *Mater Today.* 2017;20: 377–391. doi:10.1016/j.mattod.2017.02.004
- 944
- 946 17. Dakin R. The crest of the peafowl: a sexually dimorphic plumage ornament signals condition in both males and females. *J Avian Biol.* 2011;42: 405–414. doi:10.1111/j.1600-048X.2011.05444.x
- 948 18. Dakin R, Montgomerie R. Peacocks orient their courtship displays towards the sun. *Behav Ecol Sociobiol.* 2009;63: 825–834. doi:10.1007/s00265-009-0717-6
- 950 19. Freeman AR, Hare JF. Infrasound in mating displays: a peacock’s tale. *Anim Behav.* 2015;102: 241–250. doi:10.1016/j.anbehav.2015.01.029
- 952 20. Dakin R, McCrossan O, Hare JF, Montgomerie R, Kane SA. Biomechanics of the peacock’s display: How feather structure and resonance influence multimodal signaling. *PLOS ONE.* 2016;11: e0152759. doi:10.1371/journal.pone.0152759
- 954
- 956 21. Yorzinski JL, Patricelli GL, Babcock JS, Pearson JM, Platt ML. Through their eyes: selective attention in peahens during courtship. *J Exp Biol.* 2013;216: 3035–3046. doi:10.1242/jeb.087338
- 958 22. Cornec C, Hingrat Y, Aubin T, Rybak F. Booming far: the long-range vocal strategy of a lekking bird. *Open Sci.* 2017;4: 170594. doi:10.1098/rsos.170594
- 960 23. O’Neil NP, Charrier I, Iwaniuk AN. Behavioural responses of male ruffed grouse (*Bonasa umbellus*, L.) to playbacks of drumming displays. *Ethology.* 2018;124: 161–169. doi:10.1111/eth.12718
- 962
- 964 24. Dooling RJ, Searcy MH. Amplitude modulation thresholds for the parakeet (*Melopsittacus undulatus*). *J Comp Physiol.* 1981;143: 383–388. doi:10.1007/BF00611177
- 966 25. Klump GM, Okanoya K. Temporal modulation transfer functions in the European Starling (*Sturnus vulgaris*): I. Psychophysical modulation detection thresholds. *Hear Res.* 1991;52: 1–11. doi:10.1016/0378-5955(91)90182-9
- 968
- 970 26. Dent ML, Klump GM, Schwenzfeier C. Temporal modulation transfer functions in the barn owl (*Tyto alba*). *J Comp Physiol A.* 2002;187: 937–943. doi:10.1007/s00359-001-0259-5

# PREPRINT VERSION

- 972 27. Barth FG, Humphrey JAC, Srinivasan MV. *Frontiers in Sensing: From Biology to Engineering*. Berlin: Springer Science & Business Media; 2012.
- 974 28. Sofroniew NJ, Svoboda K. Whisking. *Curr Biol*. 2015;25: R137–R140. doi:10.1016/j.cub.2015.01.008
- 976 29. Bleckmann H, Mogdans J, Coombs SL. *Flow sensing in air and water*. Berlin, Germany: Springer; 2014.
- 978 30. Yu YSW, Graff MM, Hartmann MJZ. Mechanical responses of rat vibrissae to airflow. *J Exp Biol*. 2016;219: 937–948. doi:10.1242/jeb.126896
- 980 31. Fletcher NH. *Acoustic Systems in Biology*. New York, USA: Oxford University Press; 1992.
- 982 32. Larsen ON, Wahlberg N. Sound and Sound Sources. In: Brown C, Riede T, editors. *Comparative Bioacoustics: An Overview*. Sharjah, UAE: Bentham Science Publishers; 2017. pp. 3–61.
- 984 33. Lucas AM, Stettenheim PR. Structure of Feathers. *Avian Anatomy: Integument*. Washington, DC: US Department of Agriculture; 1972. pp. 341–419.
- 986 34. Weir KA, Lunam CA. The Structure and Sensory Innervation of the Integument of Ratites. *The Welfare of Farmed Ratites*. Berlin: Springer; 2011. pp. 131–145. doi:10.1007/978-3-642-19297-5\_7
- 988 35. Bradbury JW, Vehrencamp SL. *Principles of Animal Communication*. Sunderland, USA: Sinauer; 2011.
- 990 36. Necker R. Receptors in the skin of the wing of pigeons and their possible role in bird flight. In: Nachtigall W, editor. *Biona Report*. Stuttgart, New York: Fischer; 1985. pp. 433–444.
- 992 37. Stettenheim PR. The integumentary morphology of modern birds—an overview. *Am Zool*. 2000;40: 461–477. doi:10.1668/0003-1569(2000)040[0461:TIMOMB]2.0.CO;2
- 994 38. Hart NS. Vision in the peafowl (*Aves: Pavo cristatus*). *J Exp Biol*. 2002;205: 3925–3935.
- 998 39. Tautz J, Markl H. Caterpillars detect flying wasps by hairs sensitive to airborne vibration. *Behav Ecol Sociobiol*. 1978;4: 101–110. doi:10.1007/BF00302564
- 1000 40. Kirchner WH. Hearing in honeybees: the mechanical response of the bee's antenna to near field sound. *J Comp Physiol A*. 1994;175: 261–265. doi:10.1007/BF00192985
- 1002 41. Magal C, Dangles O, Caparroy P, Casas J. Hair canopy of cricket sensory system tuned to predator signals. *J Theor Biol*. 2006;241: 459–466. doi:10.1016/j.jtbi.2005.12.009

# PREPRINT VERSION

- 1004 42. Tsujiuchi S, Sivan-Loukianova E, Eberl DF, Kitagawa Y, Kadowaki T. Dynamic range  
compression in the honey bee auditory system toward waggle dance sounds. PLOS  
1006 ONE. 2007;2: e234. doi:10.1371/journal.pone.0000234
- 1008 43. Barth FG. A spider's world: senses and behavior. Springer Science & Business Media;  
2013.
- 1010 44. Paton JA, Capranica RR, Dragsten PR, Webb WW. Physical basis for auditory frequency  
analysis in field crickets (Gryllidae). J Comp Physiol. 1977;119: 221–240.  
doi:10.1007/BF00656635
- 1012 45. Sueur J, Windmill JFC, Robert D. Sound emission and reception tuning in three cicada  
species sharing the same habitat. J Acoust Soc Am. 2010;127: 1681–1688.  
1014 doi:10.1121/1.3291036
- 1016 46. Kämper G, Dambach M. Response of the cercus-to-giant interneuron system in crickets  
to species-specific song. J Comp Physiol. 1981;141: 311–317.  
doi:10.1007/BF00609933
- 1018 47. Dambach M, Rausche H-G, Wendler G. Proprioceptive feedback influences the calling  
song of the field cricket. Naturwissenschaften. 1983;70: 417–418.  
1020 doi:10.1007/BF01047183
- 1022 48. Heinzl H-G, Dambach M. Travelling air vortex rings as potential communication  
signals in a cricket. J Comp Physiol A. 1987;160: 79–88. doi:10.1007/BF00613443
- 1024 49. Heidelbach J, Dambach M. Wing-flick signals in the courtship of the African cave  
cricket, *Phaeophilacris spectrum*. Ethology. 1997;103: 827–843. doi:10.1111/j.1439-  
0310.1997.tb00124.x
- 1026 50. Lunichkin AM, Zhemchuzhnikov MK, Knyazev AN. Basic elements of behavior of the  
cricket *Phaeophilacris bredoides* Kaltenbach (Orthoptera, Gryllidae). Entomol Rev.  
1028 2016;96: 537–544. doi:10.1134/S0013873816050031
- 1030 51. Greenfield MD. Signalers and Receivers: Mechanisms and Evolution of Arthropod  
Communication. New York, USA: Oxford University Press; 2002.
- 1032 52. Santer RD, Hebets EA. Agonistic signals received by an arthropod filiform hair allude  
to the prevalence of near-field sound communication. Proc R Soc Lond B Biol Sci.  
2008;275: 363–368. doi:10.1098/rspb.2007.1466
- 1034 53. Barth FG. The Slightest Whiff of Air: Airflow Sensing in Arthropods. Flow Sensing in  
Air and Water. Berlin: Springer; 2014. pp. 169–196. doi:10.1007/978-3-642-41446-  
1036 6\_7
- 1038 54. Markl H. Vibrational Communication. Neuroethology and Behavioral Physiology.  
Berlin: Springer; 1983. pp. 332–353. doi:10.1007/978-3-642-69271-0\_24

# PREPRINT VERSION

- 1040 55. Sisneros JA. Fish Hearing and Bioacoustics: An Anthology in Honor of Arthur N. Popper and Richard R. Fay. Berlin: Springer; 2015.
- 1042 56. Kalmijn AJ. Hydrodynamic and Acoustic Field Detection. Sensory Biology of Aquatic Animals. New York, USA: Springer; 1988. pp. 83–130. doi:10.1007/978-1-4612-3714-3\_4
- 1044 57. Blackstock DT. Fundamentals of Physical Acoustics. New Jersey, USA: John Wiley & Sons; 2000.
- 1046 58. Rogers PH, Cox M. Underwater Sound as a Biological Stimulus. Sensory Biology of Aquatic Animals. Springer, New York, NY; 1988. pp. 131–149. doi:10.1007/978-1-4612-3714-3\_5
- 1050 59. De Bree H-E, Svetovoy V, Raangs R, Visser R. The very near field: theory, simulations and measurements of sound pressure and particle velocity in the very near field. St. Petersburg, Russia; 2004. Available:  
1052 <https://research.utwente.nl/en/publications/the-very-near-field-theory-simulations-and-measurements-of-sound->
- 1054 60. Dakin R, Montgomerie R. Peahens prefer peacocks displaying more eyespots, but rarely. Anim Behav. 2011;82: 21–28. doi:10.1016/j.anbehav.2011.03.016
- 1056 61. Imber MJ. Filoplumes of petrels and shearwaters. N Z J Mar Freshw Res. 1971;5: 396–403. doi:10.1080/00288330.1971.9515393
- 1058 62. James PC. The filoplumes of the Manx Shearwater *Puffinus puffinus*. Bird Study. 1986;33: 117–120. doi:10.1080/00063658609476907
- 1060 63. Childress RB, Bennun LA. Sexual character intensity and its relationship to breeding timing, fecundity and mate choice in the great cormorant *Phalacrocorax carbo lucidus*. J Avian Biol. 2002;33: 23–30. doi:10.1034/j.1600-048X.2002.330105.x
- 1062 64. Clark GA, de Cruz JB. Functional interpretation of protruding filoplumes in oscines. The Condor. 1989;91: 962–965. doi:10.2307/1368080
- 1064 65. Williams CL, Hagelin JC, Kooyman GL. Hidden keys to survival: the type, density, pattern and functional role of emperor penguin body feathers. Proc R Soc B. 2015;282: 20152033. doi:10.1098/rspb.2015.2033
- 1066 66. Bostwick KS, Elias DO, Mason A, Montealegre-Z F. Resonating feathers produce courtship song. Proc R Soc Lond B Biol Sci. 2009; rspb20091576. doi:10.1098/rspb.2009.1576
- 1068 67. Clark CJ, Elias DO, Girard MB, Prum RO. Structural resonance and mode of flutter of hummingbird tail feathers. J Exp Biol. 2013;216: 3404–3413. doi:10.1242/jeb.085993
- 1070  
1072

# PREPRINT VERSION

- 1074 68. Cummins B, Gedeon T. Assessing the Mechanical Response of Groups of Arthropod  
1076 Filiform Flow Sensors. *Frontiers in Sensing*. Springer, Vienna; 2012. pp. 239–250.  
doi:10.1007/978-3-211-99749-9\_16
- 1078 69. Taylor AM, Bonser RHC, Farrent JW. The influence of hydration on the tensile and  
compressive properties of avian keratinous tissues. *J Mater Sci*. 2004;39: 939–942.  
doi:10.1023/B:JMISC.0000012925.92504.08
- 1080 70. Dakin R, van Beveren D, Amador Kane S. Statistical supplement to: Biomechanics of  
1082 the peafowl’s crest reveals frequencies tuned to social displays.  
<https://doi.org/10.6084/m9.figshare.5451379.v5> [Internet]. 2018. Available:  
<https://doi.org/10.6084/m9.figshare.5451379.v5>
- 1084 71. Hartmann MJ, Johnson NJ, Towal RB, Assad C. Mechanical characteristics of rat  
1086 vibrissae: resonant frequencies and damping in isolated whiskers and in the awake  
behaving animal. *J Neurosci*. 2003;23: 6510–6519.
- 1088 72. Wolfe J, Hill DN, Pahlavan S, Drew PJ, Kleinfeld D, Feldman DE. Texture coding in the  
rat whisker system: Slip-stick versus differential resonance. *PLOS Biol*. 2008;6: e215.  
doi:10.1371/journal.pbio.0060215
- 1090 73. Shatz LF, Groot TD. The frequency response of the vibrissae of harp seal, *Pagophilus*  
1092 *groenlandicus*, to sound in air and water. *PLOS ONE*. 2013;8: e54876.  
doi:10.1371/journal.pone.0054876
- 1094 74. Hans H, Miao JM, Triantafyllou MS. Mechanical characteristics of harbor seal (*Phoca*  
1096 *vitulina*) vibrissae under different circumstances and their implications on its sensing  
methodology. *Bioinspir Biomim*. 2014;9: 036013. doi:10.1088/1748-  
3182/9/3/036013
- 1098 75. Dirks J-H, Dürr V. Biomechanics of the stick insect antenna: Damping properties and  
structural correlates of the cuticle. *J Mech Behav Biomed Mater*. 2011;4: 2031–2042.  
doi:10.1016/j.jmbbm.2011.07.002
- 1100 76. Gao J, Chu J, Shang H, Guan L. Vibration attenuation performance of long-eared owl  
1102 plumage. *Bioinspired Biomim Nanobiomaterials*. 2015;4: 187–198.  
doi:10.1680/jbibn.15.00003
- 1104 77. Ferrer B, Espinosa J, Roig AB, Perez J, Mas D. Vibration frequency measurement using  
a local multithreshold technique. *Opt Express*. 2013;21: 26198–26208.  
doi:10.1364/OE.21.026198
- 1106 78. Paunescu G, Lutzmann P, Göhler B, Wegner D. Comparison of high speed imaging  
1108 technique to laser vibrometry for detection of vibration information from objects.  
*Electro-Optical Remote Sensing, Photonic Technologies, and Applications IX*.  
International Society for Optics and Photonics; 2015. p. 96490D.  
1110 doi:10.1117/12.2194753



# PREPRINT VERSION

- 1112 79. Smith WF. *Waves and Oscillations: A Prelude to Quantum Mechanics*. New York, USA: Oxford University Press; 2010.
- 1114 80. Biewener AA, Full RJ. Force platforms and kinematic analysis. In: Biewener AA, editor. *Biomechanics - Structures and Systems: A Practical Approach*. IRL Press; 1992.
- 1116 81. Clark CJ, Mountcastle AM, Mistick E, Elias DO. Resonance frequencies of honeybee (*Apis mellifera*) wings. *J Exp Biol*. 2017;220: 2697–2700. doi:10.1242/jeb.154609
- 1118 82. Neimark MA, Andermann ML, Hopfield JJ, Moore CI. Vibrissa resonance as a transduction mechanism for tactile encoding. *J Neurosci*. 2003;23: 6499–6509. doi:10.1523/JNEUROSCI.23-16-06499.2003
- 1120 83. Gerhardt HC. *Conducting Playback Experiments and Interpreting their Results*. Playback and Studies of Animal Communication. Boston, MA: Springer; 1992. pp. 59–  
1122 77. doi:10.1007/978-1-4757-6203-7\_5
- 1124 84. Hillgarth N. Social organization of wild peafowl in India. *World Pheas Assoc J*. 1984;9: 47–56.
- 1126 85. Toole FE. *Sound Reproduction: Loudspeakers and Rooms*. Oxford, UK: Focal Press; 2008.
- 1128 86. Weiss IM, Kirchner HOK. The peacock's train (*Pavo cristatus* and *Pavo cristatus mut. alba*) I. structure, mechanics, and chemistry of the tail feather coverts. *J Exp Zool Part Ecol Genet Physiol*. 2010;313A: 690–703. doi:10.1002/jez.641
- 1130 87. Pinheiro J, Bates D, DebRoy S, Sarkar D. nlme 3.1-131: linear and nonlinear mixed  
1132 effects models [Internet]. 2017. Available: <https://cran.r-project.org/web/packages/nlme/index.html>
- 1134 88. R Core Team. R 3.3.3: A Language and Environment for Statistical Computing [Internet]. Vienna, Austria: R Foundation for Statistical Computing; 2017. Available: <https://www.R-project.org>
- 1136 89. Bartoń K. MuMIn 1.15.6 [Internet]. 2015. Available: <https://cran.r-project.org/web/packages/MuMIn/index.html>
- 1138 90. Nakagawa S, Schielzeth H. A general and simple method for obtaining R<sup>2</sup> from  
1140 generalized linear mixed-effects models. *Methods Ecol Evol*. 2013;4: 133–142. doi:10.1111/j.2041-210x.2012.00261.x
- 1142 91. Nakagawa S, Schielzeth H. Repeatability for Gaussian and non-Gaussian data: a practical guide for biologists. *Biol Rev*. 2010;85: 935–956. doi:10.1111/j.1469-185X.2010.00141.x



# PREPRINT VERSION

- 1144 92. Weaver Jr W, Timoshenko SP, Young DH. Vibration problems in engineering. New  
York, USA: John Wiley & Sons; 1990.
- 1146 93. Shen J-X. A behavioral study of vibrational sensitivity in the pigeon (*Columba livia*). J  
Comp Physiol. 1983;152: 251–255. doi:10.1007/BF00611189
- 1148 94. Hörster W. Vibrational sensitivity of the wing of the pigeon (*Columba livia*) — a study  
using heart rate conditioning. J Comp Physiol A. 1990;167: 545–549.  
1150 doi:10.1007/BF00190825
- 1152 95. Crawford AC, Fettiplace R. The mechanical properties of ciliary bundles of turtle  
cochlear hair cells. J Physiol. 1985;364: 359–379.  
doi:10.1113/jphysiol.1985.sp015750
- 1154 96. Löfvenberg J, Johansson RS. Regional differences and interindividual variability in  
sensitivity to vibration in the glabrous skin of the human hand. Brain Res. 1984;301:  
1156 65–72. doi:10.1016/0006-8993(84)90403-7
- 1158 97. Shimozawa T, Murakami J, Kumagai T. Cricket Wind Receptors: Thermal Noise for the  
Highest Sensitivity Known. Sensors and Sensing in Biology and Engineering. Berlin:  
Springer; 2003. pp. 145–157. doi:10.1007/978-3-7091-6025-1\_10
- 1160 98. Ota N, Gahr M, Soma M. Tap dancing birds: the multimodal mutual courtship display of  
males and females in a socially monogamous songbird. Sci Rep. 2015;5.  
1162 doi:10.1038/srep16614
- 1164 99. Clark CJ. Locomotion-induced Sounds and Sonations: Mechanisms, Communication  
Function, and Relationship with Behavior. Vertebrate Sound Production and Acoustic  
Communication. Switzerland: Springer, Cham; 2016. pp. 83–117. doi:10.1007/978-3-  
1166 319-27721-9\_4
- 1168 100. Russell RA. Air vortex ring communication between mobile robots. Robot Auton Syst.  
2011;59: 65–73. doi:10.1016/j.robot.2010.11.002

# PREPRINT VERSION

**Figure 1**

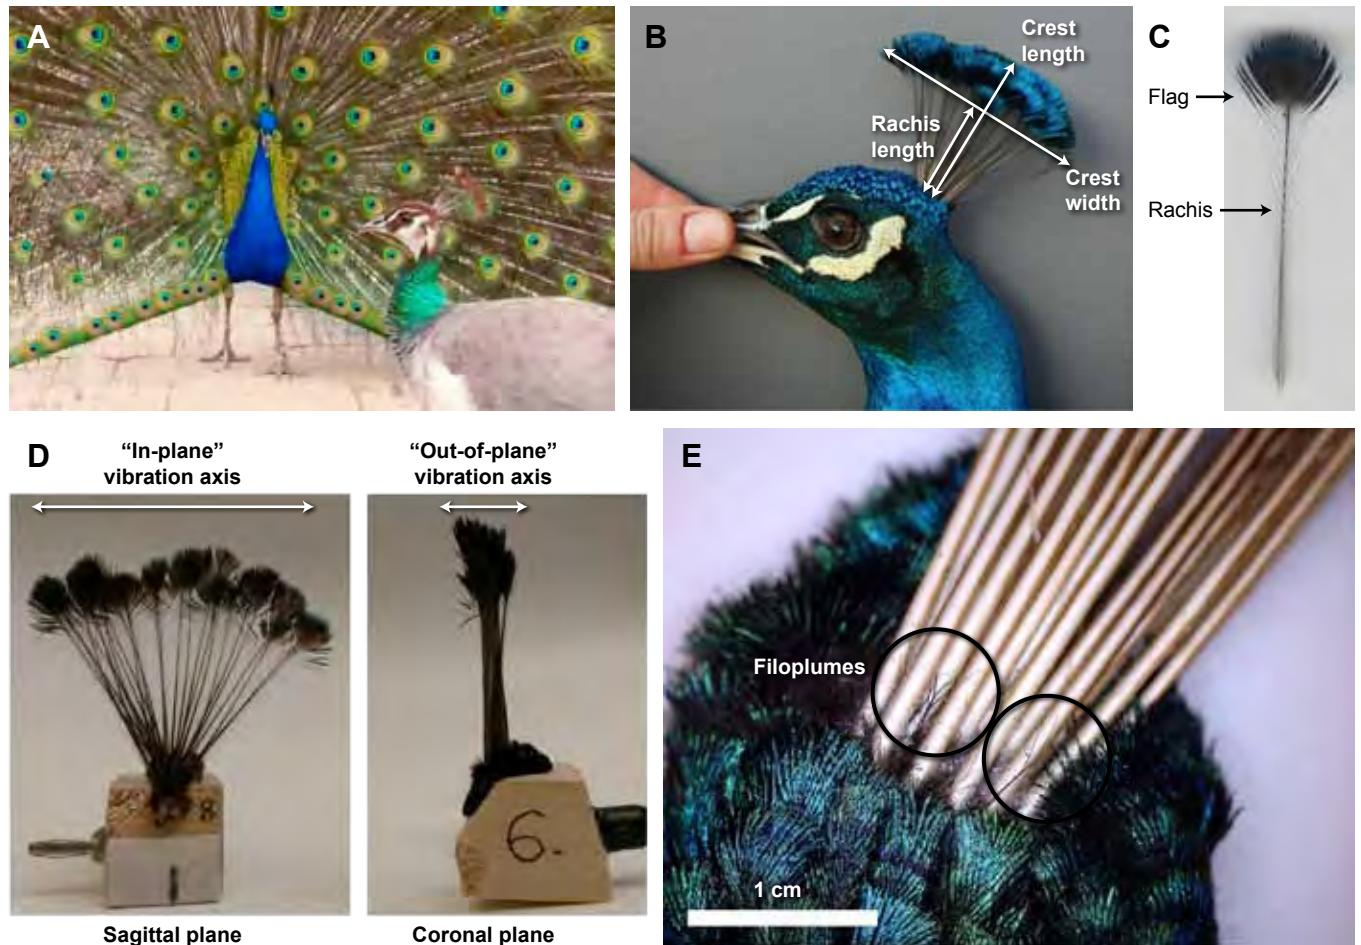

**Fig 1. Morphology of peafowl crests and crest feathers.** (A) A peahen (foreground) with the plane of her crest oriented towards the displaying peacock (background) as he performs train-rattling vibrations. (B) Both sexes have a crest with an inverted pendulum shape made up of between 20-31 feathers. This photo shows an adult male measured in vivo. (C) A single crest feather showing the pennaceous flag at the distal end. Note that only short, thin barbs are present on the relatively bare rachis (shaft) at the proximal end. (D) A whole crest sample mounted for the laboratory experiments. The two axes of vibrational motions (“in-plane” and “out-of-plane”) are indicated. (E) Mechanosensory filoplumes (circled) are located at the base of the peafowl crest feathers.

# PREPRINT VERSION

**Figure 2**

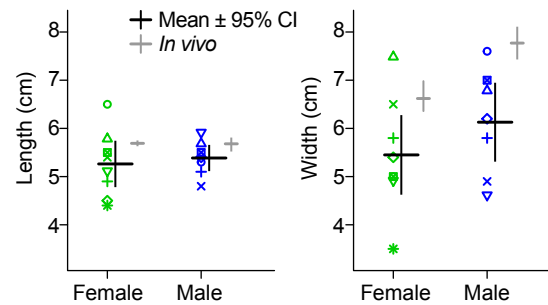

**Fig 2. Length and width of the whole crest samples as compared to live peafowl crests.**

Crests (n = 8 female, n = 7 male) measured *in vivo* (means shown to the right of each data column) had similar morphology to the dried samples, except that the crests on live birds tended to be wider. Dried sample dimensions were measured to the nearest 0.1 cm. Each crest sample is indicated by a unique symbol-color combination consistent with other figures (see S4 Table for details).

# PREPRINT VERSION

**Figure 3**

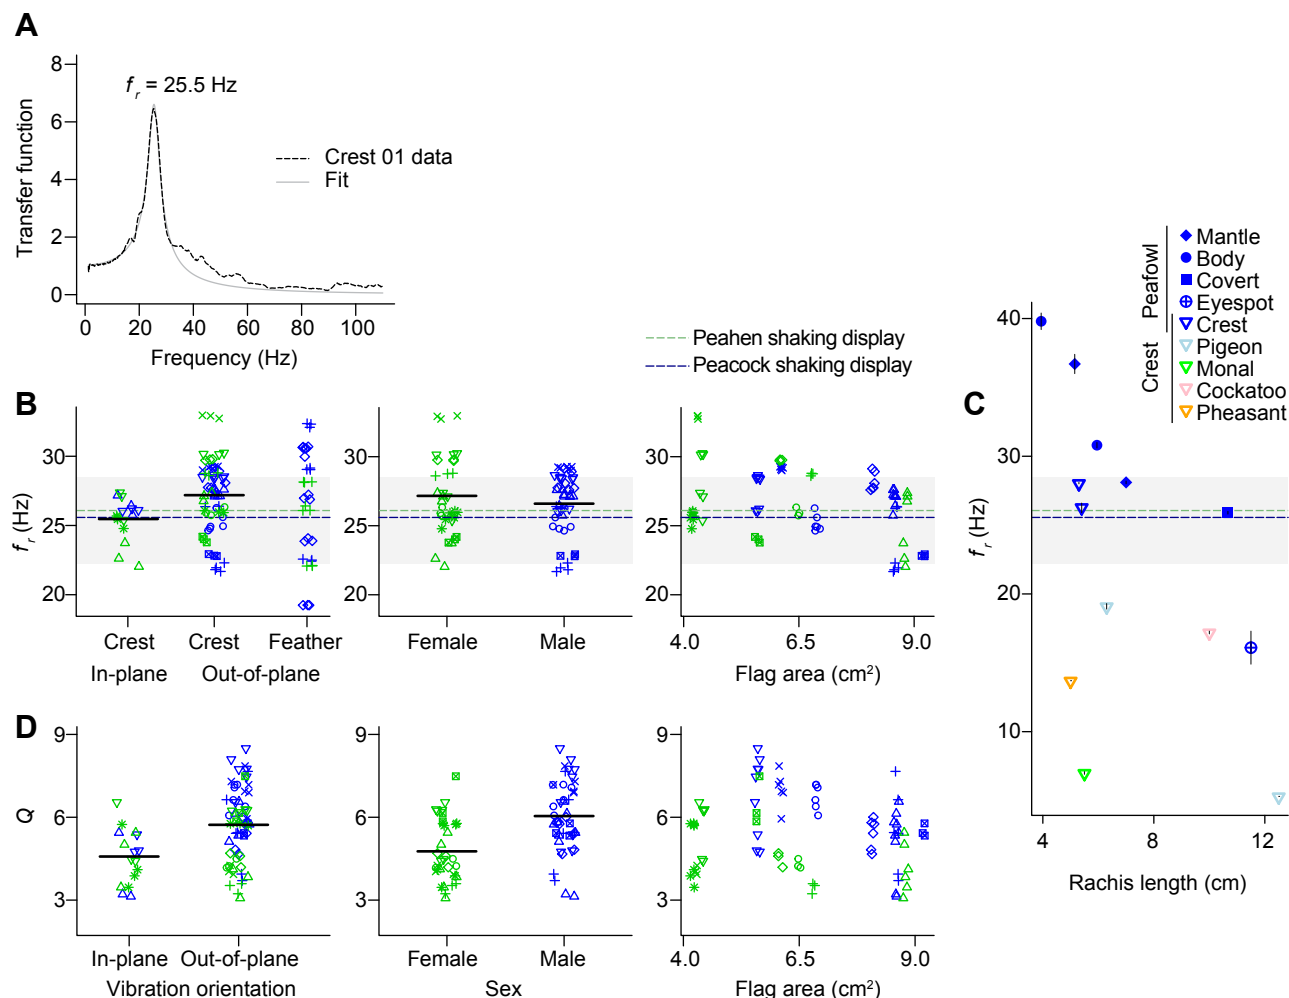

**Fig 3. Vibrational resonance properties of peafowl crests and individual crest feathers.** (A) Vibrational spectrum and Lorentzian fit for peacock crest sample Crest 01. (B-D) Data on the mean crest resonant frequencies,  $f_r$ , and quality factors,  $Q$ . Each dried crest sample ( $n = 8$  female,  $n = 7$  male) is indicated by a unique symbol-color combination, consistent with Fig 2. (B) The mean resonant frequencies,  $f_r$ , of the crest are a close match for the range of vibrational frequencies used during peafowl social displays. As an indication of measurement error, the average 95% CI for each mean  $f_r$  estimate spans 0.072 Hz. The gray shaded area is the range of vibrational frequencies of the train-rattling display, with dotted lines showing the means for displays performed by peacocks (blue) and peahens (green) [20]. Variation in  $f_r$  was influenced by the vibrational orientation and was also associated with the sex of the bird, but there was no significant association with the area of pennaceous flags at the top of the crest. The first panel in (B) also shows how a small sample of single crest feathers ( $n = 3$  from male Crest 03,  $n = 5$  from male Crest 05, and  $n = 3$  from female Crest 10) had a similar range of resonant frequencies as the whole crests vibrated in the same out-of-plane orientation. (C) Fundamental frequency for vibrations in the out-of-plane orientation for peafowl crest and non-crest feathers with similar lengths and crest feathers from four non-peafowl species described in S1 Table and S1 Fig. Means for male and female peafowl crests are both plotted. The y-axis of (C) is aligned with that of (B) for comparison. (D) The mean quality factor,  $Q$ , was also influenced by the vibrational orientation, and was associated with the sex of the bird and the area of pennaceous flags. The average 95% CI for each mean  $Q$  estimate spanned 0.233. Black horizontal lines in (B) and (D) are grand means.

# PREPRINT VERSION

**Figure 4**

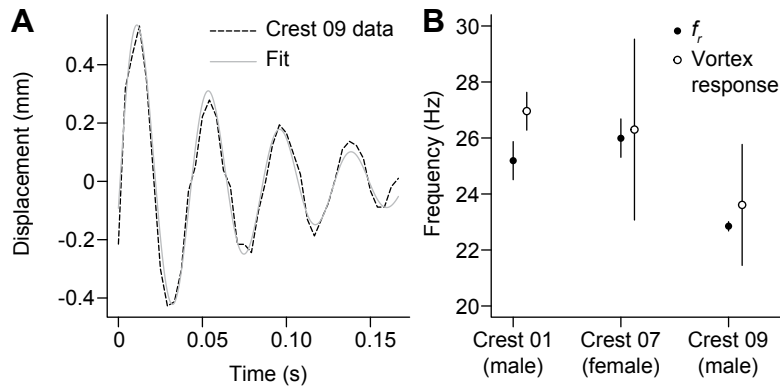

**Fig 4. Displacement of the crest in response to air vortices.** (A) Time series showing the change in flag position after a peacock crest (Crest 09) was impacted by a moving vortex of air. When peafowl crests were impacted by such air ring vortices, they deflected measurably, oscillating at their resonant frequency with an amplitude that decayed to a few percent of the initial value over the period of the peacock's wing-shaking display. (B) Mean resonant frequencies ( $f_r$ ) and mean vortex response frequencies ( $\pm 95\%$  CI) for three crests in the vortex experiment.

# PREPRINT VERSION

**Figure 5**

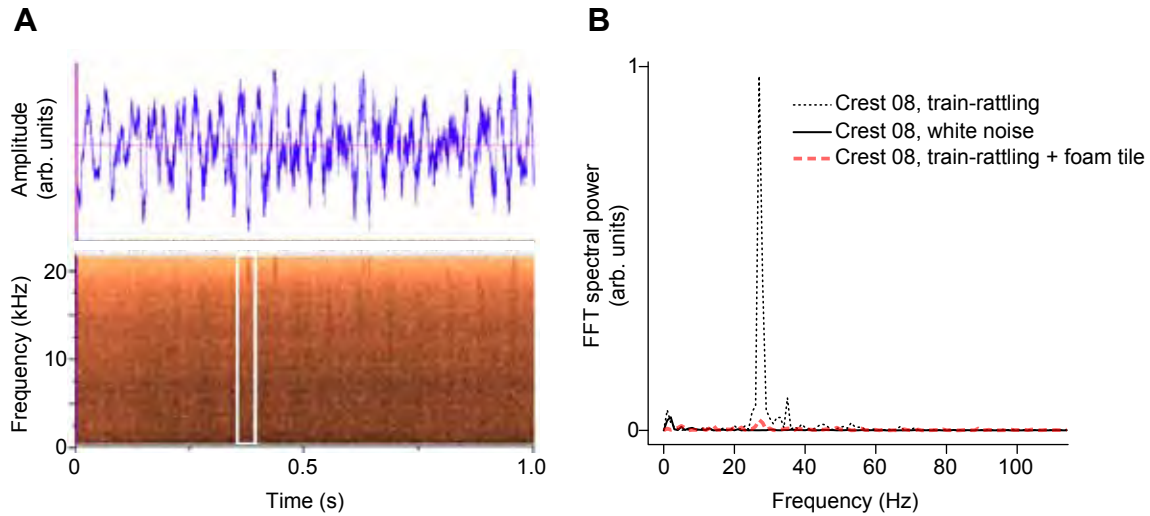

**Fig 5. Effect of audio playback on crests.** (A) An example waveform and spectrogram of the train-rattling sound used in the playback experiment. The white box in (B) highlights a single rattle note in the train-rattling spectrogram. (B) Vibrational response of a peahen crest (Crest 08) exposed to audio playback in the near-field of the speaker. The FFT spectral power during playback of train-rattling sound (dotted line, plotted on a linear scale on the y-axis) has a peak near the resonant frequency of the crest. The spectral power values recorded during white noise playback (solid line) and when the train-rattling audio was blocked by a foam tile (red dashed line) are also shown.

# PREPRINT VERSION

**Figure 6**

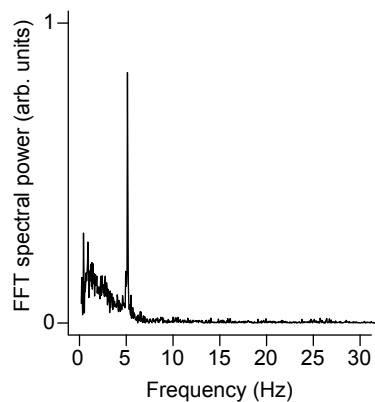

**Fig 6. Effects of simulated wing-shaking displays.** Vibrational response of a female peahen crest (Crest 13) exposed to airflow from a robot that simulated 5.0 Hz peacock wing-shaking displays at a distance 50 cm from the moving wingtip (see also S3 Fig). Note that the FFT spectral power (y-axis) is plotted on a linear scale.



# PREPRINT VERSION

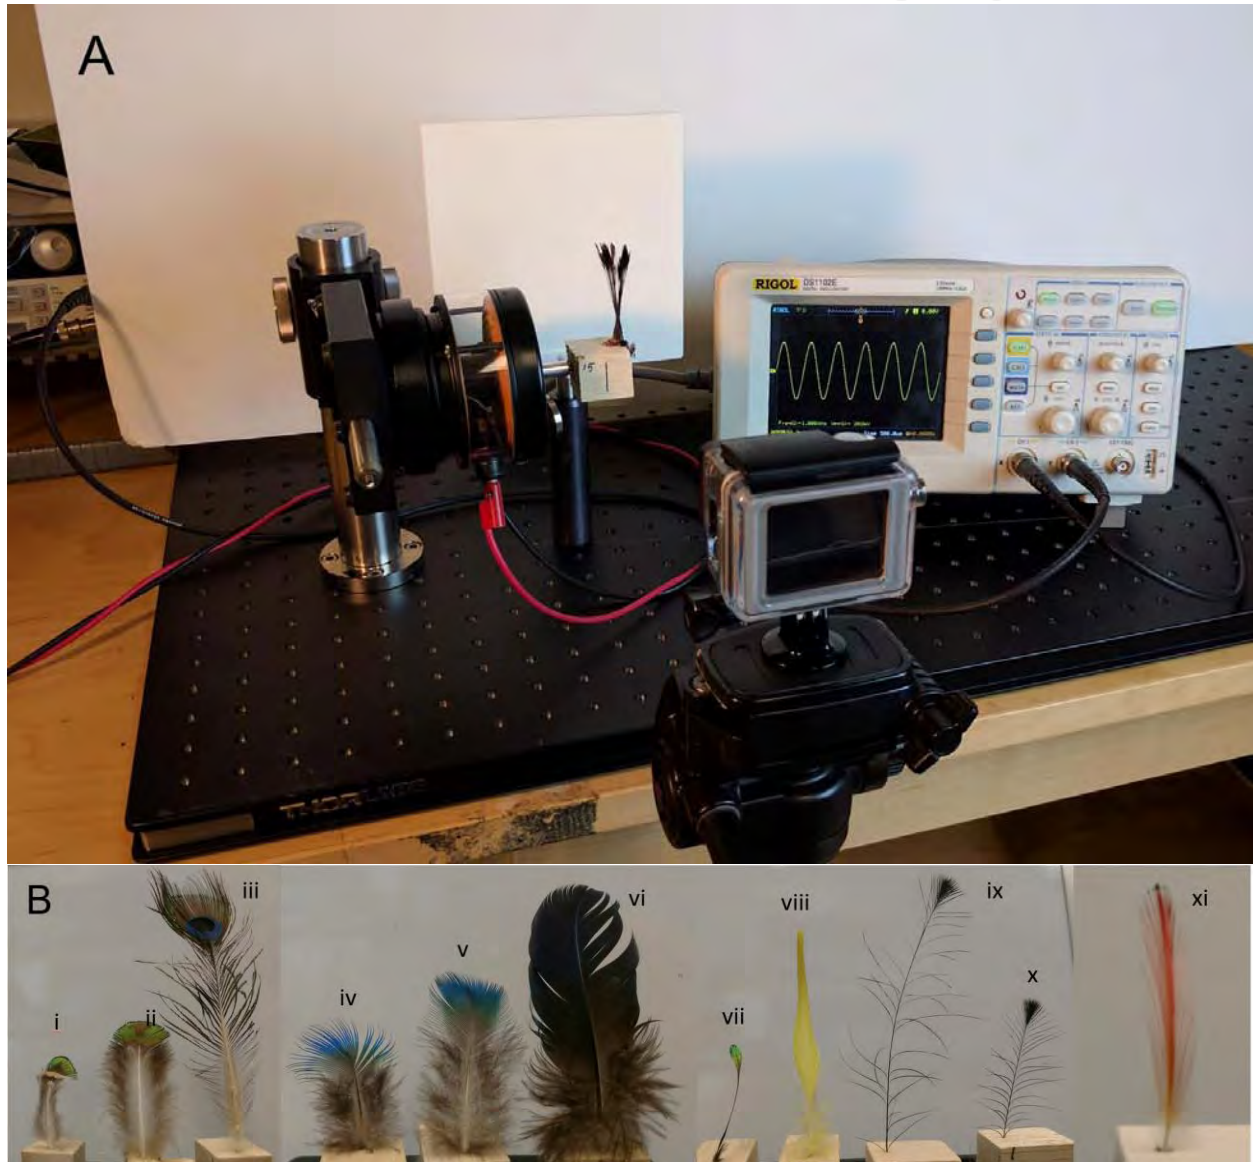

**S1 Fig. Vibrational response apparatus and feather samples.** (A) Apparatus for measuring the vibrational response of peafowl feather crests. Crests were first glued onto balsa wood blocks, which were then mounted on a mechanical shaker driven by a function generator that produced a sine wave output with a linear ramp in the frequency of shaking. The resulting motions of the crest flags and the shaker were measured using high-speed video. (B) Feather samples from Table S1 measured for comparison with peafowl crest vibrational resonant frequencies (not shown to scale): (i), (ii) peacock mantle feathers; (iii) short peacock eyespot feather; (iv), (v) peafowl body semiplumes; (vi) peacock wing covert; (vii) Himalayan monal crest feather; (viii) yellow crested cockatoo crest feather; (ix), (x) Victoria crowned pigeon crest feathers; (xi) golden pheasant crest feather.



# PREPRINT VERSION

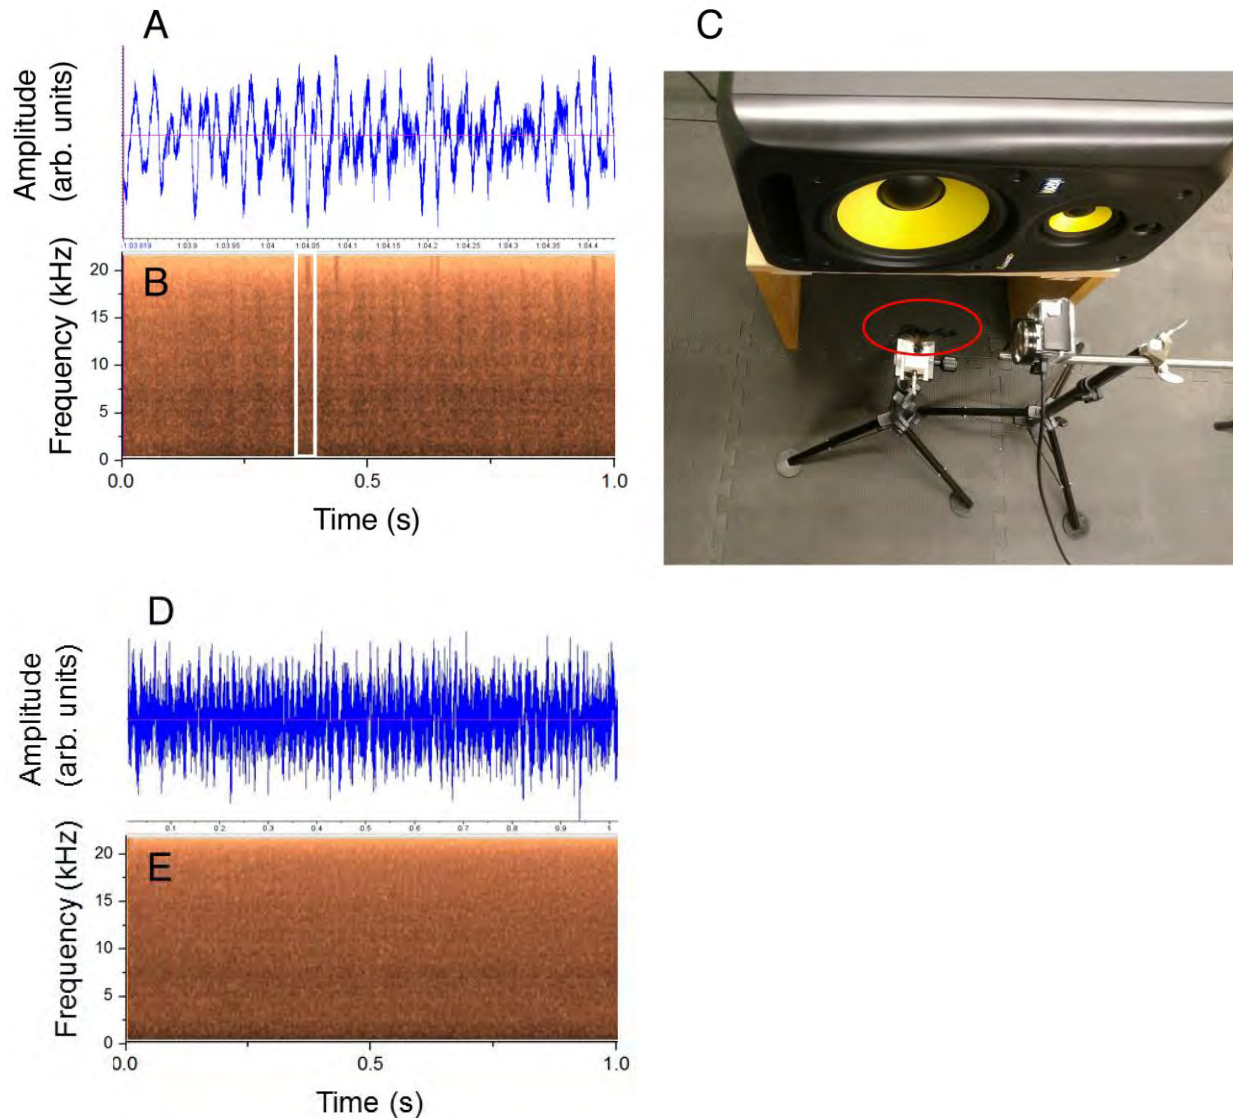

**S2 Fig. Example audio and apparatus used for measuring the vibrational response of peafowl feather crests during audio playback of peacock train-rattling mechanical sounds.** (A-B) An example waveform and spectrogram for one of the playback stimulus tracks of peacock train-rattling sounds. The waveform (A) and spectrogram (B) were generated from a re-recording made of the playback stimulus, to ensure that features of the playback stimulus matched those of the original recording from Dakin et al. (2016). The white box in (B) highlights a single rattle note in the train-rattling spectrogram. (C) Playback apparatus viewed from above. The crest sample (red ellipse) was exposed to the flow near-field of a loudspeaker (top) that played back peacock train-rattling sounds. The resulting motions of the crest flags were measured using a high-speed video camera (located to the right of the ellipse). (D-E) Waveform and spectrogram of the white noise control played back through the same audio system used for train-rattling playbacks. This illustrates the resemblance between the broad-band frequency spectrum of the white noise control (E) and the rattle notes (B). However, the white noise control lacks modulation at the low frequencies characteristic of displays.

# PREPRINT VERSION

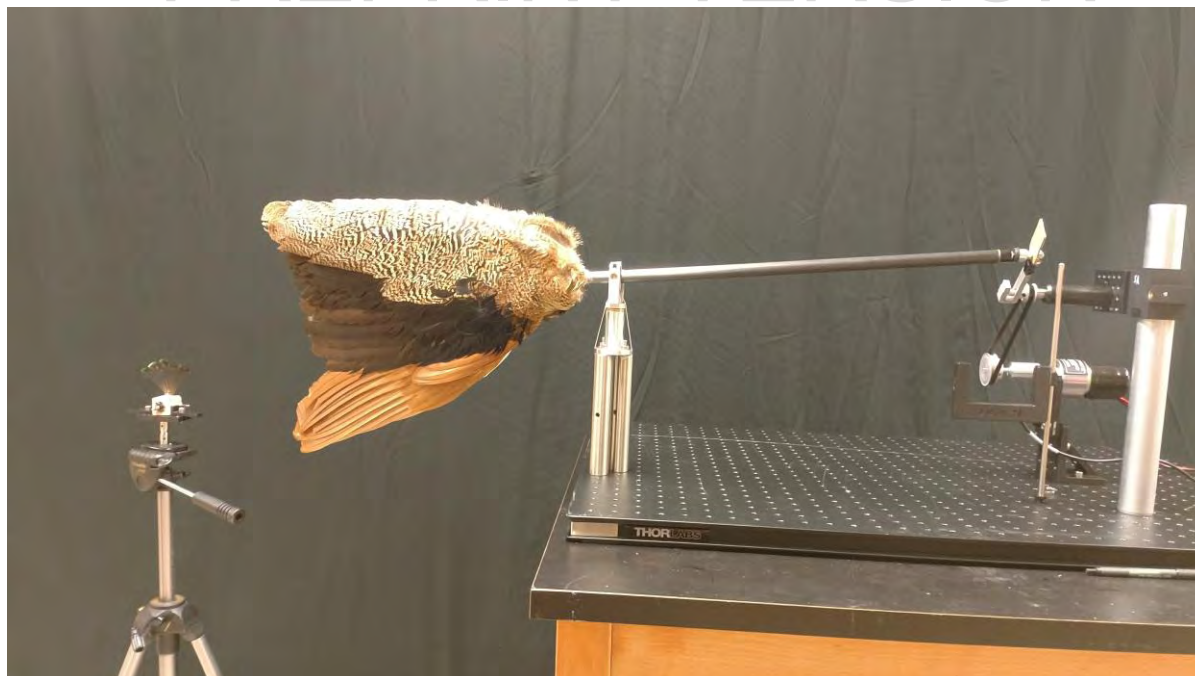

**S3 Fig. Robotic apparatus for simulating peacock wing-shaking.** Peacock wing-shaking displays were simulated using a peacock wing mounted on a carbon fiber rod. The rod was rotated at approximately 5 Hz (a typical wing-shaking frequency) about a clevis joint located at the wing's shoulder joint, ensuring that the plane of the wing's surface remained vertical while the tips circumscribed a 14 cm diameter circle. Peahen crests were positioned in the region of maximum airflow at distances  $\leq 90$  cm (50 cm shown here) from the wingtips. The resulting crest motion was filmed using high-speed video.

# PREPRINT VERSION

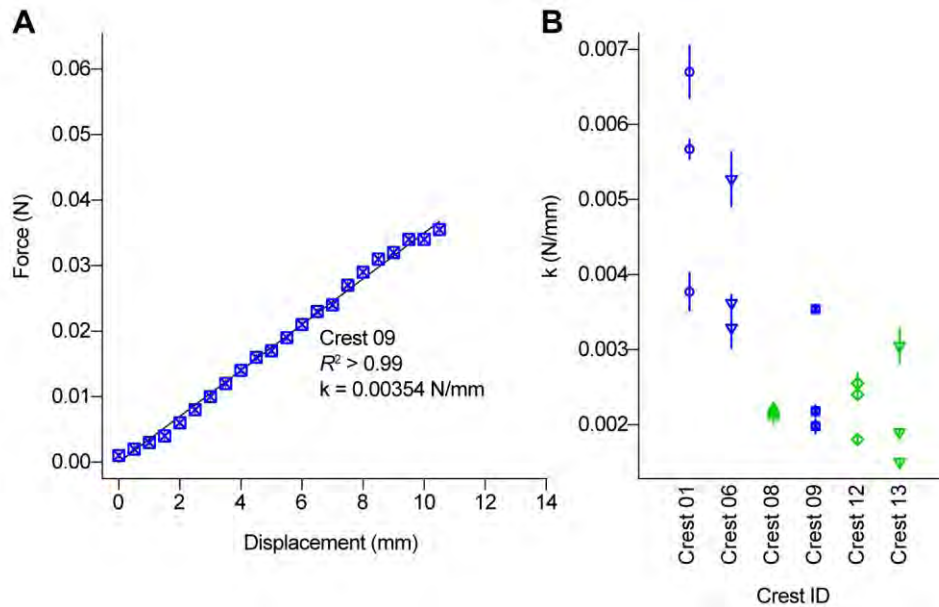

**S4 Fig. Bending spring constant,  $k$ , of peafowl crests.** Force-displacement trials were performed three times each for  $n = 3$  male and  $n = 3$  female crests, respectively. The bending spring constant,  $k$ , was calculated from the slope of linear model fits to the resulting force-displacement data from each trial. The example in (A) shows data from a single trial on peacock Crest 09 to illustrate the linearity of the response, with symbols scaled to span y-axis measurement error. (B) Values of  $k$  from each of three trials on the total  $n = 6$  crests. Each crest sample is denoted by a different symbol-color combination, following Figs. 2-3 of the main text, and ordered left to right by decreasing mean  $k$  value. Blue data are male (peacock) crests and green data are female (peahen) crests.

# PREPRINT VERSION

**S1 Table. Individual feathers used in the vibrational resonant measurements.** These values are provided for comparison with data shown in Fig. 3 for peafowl crests.

| Species                 | Feather type           | Rachis length (cm)<br>(+/- 0.05 cm 95% CI) |
|-------------------------|------------------------|--------------------------------------------|
| Indian peafowl male     | Body contour semiplume | 3.94                                       |
| Indian peafowl male     | Body contour semiplume | 5.95                                       |
| Indian peafowl male     | Wing covert            | 10.67                                      |
| Indian peafowl male     | mantle                 | 5.15                                       |
| Indian peafowl male     | mantle                 | 7.00                                       |
| Indian peafowl male     | train eyespot          | 11.50                                      |
| Victoria crowned pigeon | crest                  | 6.30                                       |
| Victoria crowned pigeon | crest                  | 12.50                                      |
| Himalayan monal         | crest                  | 5.50                                       |
| Golden pheasant         | crest                  | 5.00                                       |
| Yellow-crested cockatoo | crest                  | 10.00                                      |

# PREPRINT VERSION

**S2 Table. Sound pressure levels (SPL) of avian wingbeats during flight and wing-beating displays measured in previous studies.**

| Bird species                                                         | SPL (dB)                                                                 | Distance (m) | Reference                                                                                                                                                                             |
|----------------------------------------------------------------------|--------------------------------------------------------------------------|--------------|---------------------------------------------------------------------------------------------------------------------------------------------------------------------------------------|
| Eastern phoebes,<br><i>Sayornis phoebe</i>                           | 64-66 dB SPL at 1 kHz                                                    | 1.2 m        | Fournier, J.P., Dawson, J.W., Mikhail, A., & Yack, J.E. (2013). If a bird flies in the forest, does an insect hear it? <i>Biology letters</i> 9(5): 20130319.                         |
| Black-capped chickadees,<br><i>Poecile atricapillus</i>              | 54-60 dB SPL at 25 kHz                                                   | 1.2 m        | Fournier, J.P., Dawson, J.W., Mikhail, A., & Yack, J.E. (2013). If a bird flies in the forest, does an insect hear it? <i>Biology letters</i> 9(5): 20130319.                         |
| Crested pigeons,<br><i>Ocyphaps lophotes</i>                         | ≤ 67.6 dB SPL                                                            | 1.0 m        | Hingee, M. & Magrath, R.D. (2009) Flights of fear: a mechanical wing whistle sounds the alarm in a flocking bird. <i>Proceedings of the Royal Society of London B</i> : rspb20091110. |
| Ruffed grouse,<br><i>Bonasa umbellus</i><br>(a wing-beating display) | 66.2 dB SPL, bandwidth 300 Hz to 8 kHz, frequency weighting not reported | 1.0 m        | Garcia, M., Charrier, I., & Iwaniuk, A.N. (2012) Directionality of the drumming display of the ruffed grouse. <i>The Condor</i> 114(3): 500-506.                                      |

# PREPRINT VERSION

**S3 Table. Wingflap frequencies of adult peacocks during level and ascending flight.**

| Source                                                                                                                               | Number of individuals | Wingflap frequency (Hz) |
|--------------------------------------------------------------------------------------------------------------------------------------|-----------------------|-------------------------|
| <a href="https://www.youtube.com/watch?v=HvY_1wFSFsQ">https://www.youtube.com/watch?v=HvY_1wFSFsQ</a><br>accessed September 28, 2017 | 1                     | 4.92                    |
| <a href="https://www.youtube.com/watch?v=7gxQwm4MWns">https://www.youtube.com/watch?v=7gxQwm4MWns</a><br>accessed September 28, 2017 | 1                     | 4.16                    |
| <a href="https://www.youtube.com/watch?v=U55iMIiI_k0">https://www.youtube.com/watch?v=U55iMIiI_k0</a><br>accessed September 28, 2017 | 1                     | 6.43                    |
| <a href="https://www.youtube.com/watch?v=kZe0jLkeMuk">https://www.youtube.com/watch?v=kZe0jLkeMuk</a><br>accessed September 28, 2017 | 1                     | 4.42                    |
| <a href="https://www.youtube.com/watch?v=FrMQs7OwWC8">https://www.youtube.com/watch?v=FrMQs7OwWC8</a><br>accessed September 28, 2017 | 3                     | 6.36<br>6.00<br>5.55    |
| <a href="https://www.youtube.com/watch?v=A5xSgaXDkTY">https://www.youtube.com/watch?v=A5xSgaXDkTY</a><br>accessed September 28, 2017 | 2                     | 5.81<br>6.15            |

# PREPRINT VERSION

**S4 Table. Symbols used to indicate different crest samples in Figures 2 and 3 of the main text.**

| Symbol | Sample ID | Sex             |
|--------|-----------|-----------------|
| ○      | Crest 07  | female (peahen) |
| △      | Crest 08  | female          |
| +      | Crest 10  | female          |
| ×      | Crest 11  | female          |
| ◇      | Crest 12  | female          |
| ▽      | Crest 13  | female          |
| ■      | Crest 14  | female          |
| *      | Crest 15  | female          |
| ○      | Crest 01  | male (peacock)  |
| △      | Crest 02  | male            |
| +      | Crest 03  | male            |
| ×      | Crest 04  | male            |
| ◇      | Crest 05  | male            |
| ▽      | Crest 06  | male            |
| ■      | Crest 09  | male            |

# PREPRINT VERSION

**S5 Table. Best-fit models of  $f_r$  and  $Q$  in the analysis of the vibrational dynamics measurements.**

| Response | Fixed-effect                            | Estimate (SE) | t     | p        |
|----------|-----------------------------------------|---------------|-------|----------|
| $f_r$    | Orientation (in-plane vs. out-of-plane) | -2.22 (0.23)  | -9.46 | < 0.0001 |
|          | Sex (male vs. female)                   | 0.26 (1.49)   | 0.18  | 0.86     |
|          | Top area                                | -0.82 (0.46)  | -1.78 | 0.10     |
| $Q$      | Orientation (in-plane vs. out-of-plane) | -1.26 (0.25)  | -4.94 | < 0.0001 |
|          | Sex (male vs. female)                   | 1.85 (0.49)   | 3.71  | 0.005    |
|          | Top area                                | -0.37 (0.15)  | -2.40 | 0.04     |



# PREPRINT VERSION

**S6 Table. Species in which both sexes have crests of flexible feathers and the male also performs a shaking display.** There are many bird species wherein both sexes have a flexible feather crest. To understand the taxonomic breadth of birds that have shaking displays in addition to the crest, we used natural history resources including photos, videos and descriptive accounts of appearance and behavior. We documented at least 35 species across 10 different orders in which the females exhibit flexible feather crests and the males are known to perform shaking displays.

| Order             | Species                                                                                                                                                                                                                                                                                                                                                                                                                                                   | Common name                                                                                                                                                                                                                                                                                                      |
|-------------------|-----------------------------------------------------------------------------------------------------------------------------------------------------------------------------------------------------------------------------------------------------------------------------------------------------------------------------------------------------------------------------------------------------------------------------------------------------------|------------------------------------------------------------------------------------------------------------------------------------------------------------------------------------------------------------------------------------------------------------------------------------------------------------------|
| Accipitriformes   | <i>Sagittarius serpentarius</i>                                                                                                                                                                                                                                                                                                                                                                                                                           | Secretary bird                                                                                                                                                                                                                                                                                                   |
| Cariamiformes     | <i>Cariama cristata</i>                                                                                                                                                                                                                                                                                                                                                                                                                                   | Crested cariana                                                                                                                                                                                                                                                                                                  |
| Columbiformes     | <i>Geophaps plumifera</i><br><i>Goura cristata</i><br><i>Goura scheepmakeri</i><br><i>Goura victoria</i><br><i>Ocyphaps lophotes</i>                                                                                                                                                                                                                                                                                                                      | Spinifex pigeon<br>Western crowned pigeon<br>Southern crowned pigeon<br>Victoria crowned pigeon<br>Crested pigeon                                                                                                                                                                                                |
| Galliformes       | <i>Afropavo congensis</i><br><i>Argusianus argus</i><br><i>Colinus cristatus</i><br><i>Leipoa ocellata</i><br><i>Lophophorus impejanus</i><br><i>Lophura ignita</i><br><i>Lophura leucomelanos</i><br><i>Pavo cristatus</i><br><i>Pavo muticus</i><br><i>Polyplectron bicalcaratum</i><br><i>Polyplectron malacense</i><br><i>Polyplectron napoleonis</i><br><i>Polyplectron schleiermacheri</i><br><i>Rheinardia ocellata</i><br><i>Tetrao urogallus</i> | Congo peafowl<br>Great argus<br>Crested bobwhite<br>Malleefowl<br>Himalayan monal<br>Crested fireback<br>Kalij pheasant<br>Indian peafowl<br>Green peafowl<br>Gray peacock pheasant<br>Malayan peacock pheasant<br>Palawan peacock pheasant<br>Bornean peacock pheasant<br>Crested argus<br>Western capercaillie |
| Gruiformes        | <i>Balearica pavonina</i><br><i>Balearica regulorum</i>                                                                                                                                                                                                                                                                                                                                                                                                   | Black crowned crane<br>Gray crowned crane                                                                                                                                                                                                                                                                        |
| Opisthocomiformes | <i>Opisthocomus hoazin</i>                                                                                                                                                                                                                                                                                                                                                                                                                                | Hoatzin                                                                                                                                                                                                                                                                                                          |
| Passeriformes     | <i>Baeolophus bicolor</i><br><i>Cardinalis cardinalis</i><br><i>Onychorhynchus coronatus</i><br><i>Prionops plumatus</i><br><i>Pycnonotus jocosus</i><br><i>Rupicola peruvianus</i>                                                                                                                                                                                                                                                                       | Tufted titmouse<br>Northern cardinal<br>Royal flycatcher<br>White-crested helmetshrike<br>Red-whiskered bulbul<br>Andean cock-of-the-rock                                                                                                                                                                        |
| Pelicaniformes    | <i>Phalacrocorax auritus</i><br><i>Phalacrocorax carbo</i>                                                                                                                                                                                                                                                                                                                                                                                                | Double-crested cormorant<br>Great cormorant                                                                                                                                                                                                                                                                      |
| Suliformes        | <i>Anhinga anhinga</i>                                                                                                                                                                                                                                                                                                                                                                                                                                    | Anhinga                                                                                                                                                                                                                                                                                                          |
| Tinamiformes      | <i>Eudromia elegans</i>                                                                                                                                                                                                                                                                                                                                                                                                                                   | Elegant crested tinamou                                                                                                                                                                                                                                                                                          |
